# Supplementary material for: miR-181b targets semaphorin 3A to mediate TGF-β–induced endothelial-mesenchymal transition related to atrial fibrillation
Source: PubMed Central journal article supplement (PMC9246393; doi:10.1172/jci142548), 2022-07-01

1 **Supplemental Material**

2  
3 **MiR-181b targets semaphorin 3a to mediate TGF- $\beta$ -induced**  
4 **endothelial-to-mesenchymal transition related to atrial fibrillation**

5  
6 Ying-Ju Lai<sup>1,2,3#</sup>, Feng-Chun Tsai<sup>4, 5#</sup>, Gwo-Jyh Chang<sup>1,6</sup>, Shang-Hung Chang<sup>1,5</sup>, Chung-Chi  
7 Huang<sup>2,7</sup>, Wei-Jan Chen<sup>1,5\*</sup>, Yung-Hsin Yeh<sup>1,5\*</sup>

8 <sup>1</sup>Cardiovascular Department, Chang Gung Memorial Hospital, Tao Yuan, <sup>2</sup>Department of  
9 Respiratory Therapy, Chang Gung University College of Medicine, Tao Yuan. <sup>3</sup>Department of  
10 Respiratory Care, Chang-Gung University of Science and Technology, Chia Yi. <sup>4</sup>Department  
11 of Thoracic and Cardiovascular Surgery, Chang Gung Memorial Hospital. <sup>5</sup>Department of  
12 medicine, Chang Gung University College of Medicine, <sup>6</sup>Graduate Institute of Clinical  
13 Medical Sciences, Chang Gung University College of Medicine, <sup>7</sup> Department of Pulmonary  
14 and Critical Care Medicine, Chang Gung Memorial Hospital, Tao Yuan, Taiwan

15  
16  
17 Address for Correspondence:

18 Yung-Hsin Yeh, MD

19 The Cardiovascular Department, Chang Gung Memorial Hospital, Fu Shin Rd. No. 5, Kwei  
20 Shan, Tao Yuan 333, Taiwan

21 Tel: 886-3-3281200 ext 8162

22 Fax: 886-3-3271192

23 E-mail: [yeongshinn@cgmh.org.tw](mailto:yeongshinn@cgmh.org.tw)

24  
25 Wei-Jan Chen, MD, PhD

26 The Cardiovascular Department, Chang Gung Memorial Hospital, Fu Shin Rd. No. 5, Kwei  
27 Shan, Tao Yuan 333, Taiwan

28 Tel: 886-3-3281200 ext 8162

29 Fax: 886-3-3271192

30 E-mail: [wjchen@cgmh.org.tw](mailto:wjchen@cgmh.org.tw)

31  
32  
33  
34 # Drs Lai and Tsai contributed equally to this work.

35 \* Drs Yeh and Chen contributed equally to this article

36

**37 Human atrial appendage specimens**

38 Atrial appendage samples were obtained from 15 patients with AF and 15 patients with sinus  
39 rhythm (SR) undergoing cardiac surgery (Table 1). Informed consent was obtained from all  
40 participating patients. The study protocol was approved by the Chang Gung Medical  
41 Foundation Institutional Review Board, (IRB 104-2436A3) and the study was conducted in  
42 accordance with the principles of the Declaration of Helsinki.

**43 Histological analysis of atrial subendocardial fibrosis (ASF) thickness**

44 For all histological procedures, atrial tissues were fixed with 10% neutral formalin, immersed  
45 in formalin overnight, and embedded in paraffin. Sections (5  $\mu$ m thick) were processed for  
46 modified Masson's trichrome staining according to the manufacturer's instructions (ScyTek,  
47 catalog TRM-2-IFU, Logan, UT, USA). Trichrome staining of subendocardial fibrosis  
48 samples shows collagen (blue) deposition in the endocardium. Quantitative analysis of the  
49 thickness of collagen deposits by a color deconvolution method revealed a significant  
50 reduction in the percentage of the fibrotic area. All atrial sections were divided randomly into  
51 6 fields, and trichrome-stained ASF were measured. By microscopic examination under 200X  
52 (human and rabbit tissue sections) or 400X (mouse tissue sections) magnification, ASF was  
53 defined as the distance between the elastic laminae to the fibrotic lumen using Nikon  
54 NIS-elements 4.3.00 BR software (Supplemental Figure 1).

55

**56 Rabbit HF model**

57 All animal experiments and study protocols were reviewed and approved by the Institutional  
58 Animal Care and Use Committee of Chang -Gung Memorial Hospital (CGMH-2007100501).  
59 All surgeries were performed under anesthesia, and all efforts were made to minimize  
60 suffering. Male New Zealand rabbits weighing 2-3 kg underwent the HF surgery. The rabbits  
61 were anesthetized by intramuscular injections of Zoletil (15 mg/kg) (Virbac, Carros, France)  
62 and Rompun (5 mg/kg) (Bayer, Leverkusen, Germany). Then, the rabbits were placed on the  
63 clean surgery table, and anesthesia was maintained with 3% isoflurane (AbbVie, Lake County,  
64 IL, USA) by endotracheal intubation. While ensuring ventilation compliance, the right chest  
65 was opened at the third intercostal space, and an epicardial pacing lead was placed in the  
66 lateral wall of the right ventricle and connected to an Itriel III pacemaker (Medtronic, Inc.,  
67 Minneapolis, MN, USA) for tachycardia pacing. After 1 week of convalescence, the rabbit  
68 ventricle was paced at 372 beats/min for 3 weeks.

**69 Generation of transgenic mice with cardiac TGF- $\beta$  expression**

70 MHC-TGF-Cys33Ser transgenic mice (the generous gift from Loren J. Field, James  
71 Whitcomb Riley Hospital for Children, IN) were generated using the mouse  $\alpha$ -cardiac MHC  
72 promoter and the human TGF- $\beta$  cDNA sequence as described previously (1, 2). The resulting  
73 pups were screened by diagnostic polymerase chain reaction (PCR). For all surgeries, mice  
74 were anesthetized with a combination of Zoletil (20 mg/kg) (Virbac, Carros, France) and

75 Rompun (5 mg/kg) (Bayer, leverkusen, Germany) by intraperitoneal injection. After  
76 confirming a fully anesthetized state (e.g., no response to toe pinching), mice received  
77 programmed electrical stimulation, and the right/left atria and ventricles were dissected after  
78 sacrifice. All animal experiments were reviewed and approved by the Institutional Animal  
79 Care and Use Committee of Chang Gung Memorial Hospital (IACUC: 2016120805).

80

### 81 **Isolation and characterization of human atrial endocardial endothelial cells (AEECs)**

82 We developed a method for obtaining primary atrial EC cultures from human atrial  
83 appendages. To establish the AEECs isolation and culture protocol, we modified the  
84 pulmonary arterial EC isolation and culture protocol from Rabinovitch's laboratory at  
85 Stanford University (3). Atria were isolated from patients and rinsed 3 times in Hank's  
86 balanced salt solution (HBSS) (Gibco, catalog 14025-092, Grand Island, NY, USA) at 4°C to  
87 remove possible blood clots. The left atrium was then placed in a 50 ml conical tube and  
88 incubated with 0.4 mg/ml collagenase (Sigma-Aldrich, catalog C9722, Burlington, MA, USA)  
89 in HBSS at 37°C on a rotating platform for 20 min. After removing the collagenase solution,  
90 the inside of the left atrium was scraped gently with a 10-mm round glass slide to obtain the  
91 loosely attached EC layer and M199 (Gibco, 11150-059, Rockville, MD, USA) containing  
92 10% FBS (Gibco, catalog 26140-079) was added to harvest the cells. Then, the cell  
93 suspension was filtered using a 100 µm cell strainer (Corning Falcon, catalog 352360,  
94 Durham, NC, USA) and centrifuged for 1 min. The pellet was resuspended in M199



95 containing 10% FBS, and the cells were seeded on gelatin (Acros Organics, catalog  
96 AC611990000, Fair Lawn, NJ, USA)-coated culture dishes for 20 min at 37°C. Then, the  
97 medium was removed, and fresh EC growth medium containing 20% FBS (Supplemental  
98 Figure. 2A) was added. The culture medium was renewed every 3 days until the cells reached  
99 80% confluence. The ECs were purified by incubation for 20 min at 37°C with magnetic  
100 beads (30 µl, Dynabeads; Invitrogen, catalog 11155D, Waltham, MA, USA) conjugated with  
101 an anti-CD31 antibody. The cells bound to the beads were recovered with a magnet and  
102 washed five times with PBS containing 0.1% BSA (Sigma-Aldrich, catalog A7906,  
103 Burlington, MA, USA). The AEECs were then seeded on gelatin-coated culture dishes with  
104 EC growth medium. We utilized the endothelial-specific markers CD31 (Abcam, catalog  
105 ab28364, Cambridge, UK), and eNOS (BD Bioscience, catalog 610299, Franklin Lakes, NJ,  
106 USA) to characterize AEECs (Supplemental Figure 2B). All endothelial-specific markers  
107 were downregulated at passage 4 (Supplemental Figure 2C) and thus, the AEECs were  
108 utilized before passage 4 for the in vitro experiments. Human umbilical vein endothelial cells  
109 (HUVECs) were obtained and cultured in 0.1% gelatin-coated 100-mm dishes with EC  
110 growth medium (Lonza, catalog CC3156 and CC4176, Walkersville, MD, USA) and used  
111 between passages 5 and 7.

112

### 113 **Immunocytochemical analysis**

114 Immunocytochemical analysis of AEECs was performed with primary antibodies against

115 eNOS (BD Bioscience, catalog 610299, Franklin Lakes, NJ, USA), SMA (Abcam, catalog  
116 ab5694, Cambridge, UK), Twist (NOVUS, catalog, NBP2-37364, Briarwood Avenue  
117 Centennial, CO, USA), CD31 (Abcam, catalog ab28364, Cambridge, UK), and p-Cofilin  
118 (Cell Signaling Technology, catalog 3313, clone 77G2, Danvers, MA, USA), At the end of  
119 the experiments, cells were fixed with cold methanol; blocked with 1% goat serum/1% BSA  
120 in PBS for 30 min, and then incubated with primary antibodies for 1 h. Subsequently, the  
121 AEECs were incubated with Alexa-488-conjugated (green) (Abcam, catalog ab150113) and  
122 Cy3-conjugated (red) (abcam, catalog ab97075) secondary antibodies and then subjected to  
123 rhodamine-phalloidin (Abcam, catalog ab235138, Cambridge, UK) staining (red) for  
124 filamentous actin to observe lamellipodium formation. Nuclei were visualized by  
125 4,6-diamidino-2-phenylindole (DAPI) staining (Invitrogen, catalog P36935, Waltham, MA,  
126 USA). Fluorescence was observed with a confocal microscope (Leica, Confocal TCS SP8XL,  
127 Wetzlar and Mannheim, Germany) at the Microscope Core Laboratory of Chang Gung  
128 Memorial Hospital.

### 129 **Microarray data generation and analysis**

130 Total RNA was isolated from AEECs using TRIzol reagent (Invitrogen, catalog 15596018)  
131 and further concentrated using the PureLink™ RNA Mini kit (Invitrogen, catalog  
132 12183018A). Total RNA quality and quantity were evaluated by using a Bioanalyzer 2100  
133 (Agilent Technologies, Santa Clara, CA). Gene expression profiles were analyzed by using

134 the Affymetrix Human Transcriptome Array 2.0. (Affymetrix, Santa Clara, CA)  
135 (Supplemental Figure 3B), and array data were analyzed by the Genomic Medicine Research  
136 Core Laboratory of Chang Gung Memorial Hospital, Lin-Kou.

### 137 **Next-generation sequencing and data pre-processing**

138 Tissues were obtained from atria of mice and preserved in *RNAlater* Stabilization Solution  
139 (Invitrogen, catalog AM7020) directly after resection and stored at 4 °C. About 50~60 mg of  
140 tissues was used for RNA extraction using TRIzol Reagent (Invitrogen, catalog 15596018)  
141 according to the manufacturer's instructions. The quality of RNA was evaluated by LabChip  
142 GX, and tissue extraction RNA integrity number (RIN) greater than 7 were further processed.  
143 For the small RNA-seq, we prepared libraries using NEBNext Multiplex small RNA library  
144 Pre Set for Illumina kits according to manufacturer's instructions. Briefly, 1 µg of purified  
145 total RNA was ligated with adapter and PCR amplified. The small RNA libraries were size  
146 selected with a target insert size of 15~30 nt in length using the 6% TBE PAGE gel. The yield  
147 and size distribution of the purified RNA and small RNA libraries were assessed using the  
148 Agilent 2100 Bioanalyzer instrument with the Agilent High Sensitivity DNA Kit (Agilent  
149 Technologies, catalog 5067-4626). Equal amounts of libraries were pooled in molecular ratio  
150 and consequently sequenced by the NextSeq 500 sequencer. Small RNA-Seq raw read counts  
151 were normalized to reads per million (RPM) for quantitative representation. Principal  
152 component analysis (PCA) analysis was performed on both sequencing data sets using R

153 package ‘ggbi plot’ and ‘stats’. For the differential expression analysis. R/BioConductor  
154 ‘DESeq. 2’ was used to perform the differential expression analysis. We defined differentially  
155 expressed genes (DEGs) and miRNAs (DEMs) in the TGF- $\beta$  transgenic mice/ WT mice  
156 comparison on the basis of P value  $<0.05$  and  $-2 >$ , fold change  $> 2$ . For the comparison  
157 among groups, differential expression analysis was performed for the samples and DEGs  
158 were defined by p-value  $<0.05$  and fold change  $> 2$ .

159

### 160 **Quantitative reverse transcription-PCR (qRT-PCR)**

161 miRNAs were isolated from AEECs with the miRNeasy mini kit (Qiagen, catalog 217004,  
162 Hilden, Germany) according to the manufacturer’s protocol. Real-time qRT-PCR was  
163 performed as described previously (4). Briefly, total RNA containing miRNA was  
164 polyadenylated, and cDNA was synthesized using a poly(T) primer with a 3’ degenerate  
165 anchor and a 5’ universal tag. Then, cDNA served as the template for miRNA qRT-PCR using  
166 the miCURY LNA<sup>TM</sup> RT kit (Qiagen, catalog 339340) and the following Qiagen-validated  
167 primers: miR-181b-specific primers (hsa-miR-181b-3p target sequence:  
168 5’-CUCACUGAACAAUGAAUGCAA-3’) and U6 snRNA control primers (Qiagen, catalog  
169 YP00203907, Hilden, Germany). qRT-PCR analysis of primary (Pri), precursor (Pre)  
170 transcripts of miR-181b in AEECs using 18S rRNA as the loading control. qRT-PCR assays  
171 were performed using the 7900HT Fast Real-Time PCR System (Applied Biosystems, Foster  
172 city, CA) with the following program: denaturation at 95°C for 10 min, followed by 40 cycles

173 of 95°C for 10 s and 60°C for 60 s, and ending with melting curve analyses. To determine  
174 Sema3a RNA expression levels, total cellular RNA was extracted using a PureLink™ RNA  
175 Mini kit (Invitrogen, catalog 12183018A) according to the manufacturer's protocol, and  
176 qRT-PCR was performed as described previously. GAPDH mRNA was used as an internal  
177 control. The primers were as follows: Sema3a forward:  
178 5'-GCTCATCAACCACCCCAATC-3' and reverse: 5'-ATGCAGCTCAGACACTCCTC3';  
179 and GAPDH forward: 5'-GAAGGTGAAGGTCGGAGT-3' and reverse:  
180 5'-GAAGATGGTGATGGGATTTC-3'. Relative Sema3a expression was calculated using the  
181  $2^{-\Delta\Delta C_t}$  method with SYBR Green detection.

## 182 **Western blot analysis**

183 Proteins were extracted and processed as described previously (4). Western blotting was  
184 performed using primary antibodies against CD31 (Abcam, catalog ab28364), eNOS (BD  
185 Bioscience, 610299), SMA (Thermo Scientific, catalog MS-113-P, clone 1A4, Waltham, MA,  
186 USA), HGF (Abcam, catalog ab83760), Sema3A (Abnova, catalog H00010371-M01, clone  
187 5G9, Taipei, Taiwan), VE-Cadherin (Cell Signaling Technology, catalog 2500, clone D87F2),  
188 p-Vimentin (Ser83) (Cell Signaling Technology, catalog 3878), p-Vimentin (Ser56) (Cell  
189 Signaling Technology, catalog 3877), total Vimentin (Cell Signaling Technology, catalog  
190 9775, clone D21H3), Twist (NOVUS, catalog, NBP2-37364), Snail (Cell Signaling  
191 Technology, catalog 3879, clone C15D3), Slug (Cell Signaling Technology, catalog 9585,

192 clone C19G7), SM22  $\alpha$  (Abcam, catalog ab14106), LIM kinase (LIMK) (Cell Signaling  
193 Technology, catalog 3845, clone 8C11), p-Cofilin (Cell Signaling Technology, catalog 3313,  
194 clone 77G2), total Cofilin (Cell Signaling Technology, catalog 5175, clone D3F9) and  
195 Collagen (Abcam, catalog ab21286). Signals were detected using the ECL detection method  
196 (Millipore, catalog WBULS0500, Temecula, CA, USA) and quantified by densitometry.  
197 Immunoreactive bands were in the linear range, and the results are presented relative to the  
198 bands corresponding to the GAPDH (Santa Cruz Biotechnology, catalog SC-32233, clone 6C5,  
199 Dallas, TX) or tubulin antibody (Santa Cruz Biotechnology, catalog 32293, clone DM1A).

200

201 **Small interfering (si) RNA, miR-181b antagomir, target site blockers and miR-181b**  
202 **mimic in AEECs**

203 Chemically synthetic siRNA targeting human Smad3 (Dharmacon, catalog  
204 L-020067-00-0005 Lafayette, CO) or, Sema3a (Dharmacon, catalog L-020091-00-0005), and  
205 control siRNA were purchased from Dharmacon (Thermo Fisher Scientific Inc). The siRNAs  
206 sequences are presented in Table 2. AEECs at 70% confluence were transfected with 25 nM  
207 siRNA for 24 h using Lipofectamine<sup>TM</sup> RNAi MAX Transfection Reagent (Invitrogen,  
208 catalog 13778-150, Waltham, MA, USA) according to the manufacturer's instructions. Next,  
209 the transfected cells were cultured in regular culture medium, and protein was collected 48 h  
210 after transfection. The knockdown efficiency was evaluated at 48 h by measuring protein  
211 levels in lysates via Western immunoblotting (see Western blot analysis). The miR-181b-3p

212 mimic (Qiagen, catalog YM004700056) and antagomir (antagomir-181b) (Qiagen, catalog  
213 YI04104675) and negative control oligonucleotides (Qiagen, catalog YM00479902 and  
214 YI00199006) were purchased from Qiagen. Oligomers (100nM) were transfected into AEECs  
215 using DharmaFECT 1 (Dharmacon, catalog T-2001-01, Lafayette, CO, USA) according to the  
216 manufacturer's instructions. To interfere with the binding of miR-181b to its targets,  
217 miRCURY LNA<sup>TM</sup> miRNA Power Target Site Blockers (Qiagen catalog YT0071336) with  
218 the following custom sequences were used according to the manufacturer's instructions.:  
219 5'-TTCAGTGGGGGAAGAGGACA-3'.

#### 220 **Luciferase reporter assay for the Sema3a 3' untranslated region (UTR).**

221 For the luciferase reporter experiments, the Sema3a 3'UTR was amplified by PCR from  
222 human genomic DNA (forward: 5'-TATGGAAAAGAATACTGTCAAG-3'; reverse:  
223 5'-AGAAGACCAGTATGGTCACAGTT-3'). The PCR product was ligated into the pMIR  
224 luciferase reporter (pMIR-REPORT System, Ambion). AEECs were transfected with  
225 *TransIT*®-LT1 transfection reagent (Mirus, catalog MIR2300, Madison, WI) according to the  
226 manufacturer's protocol. Site-directed mutagenesis of the putative miR-181b binding sites  
227 was performed by PCR using the Q5 Site-Directed Mutagenesis kit (New England Biolabs,  
228 catalog E0554, Ipswich, MA). All sequences related to PCR are presented in Table 2.  
229 Luciferase activity was measured with a luciferase assay kit (BioThema, catalog 484-001,  
230 Handen, Sweden) and detected by a luminometer (Promega, GloMax® Luminometer,

231 Madison, WI).

### 232 **Luciferase reporter assay for miR-181b promoter activity**

233 For the luciferase reporter experiments, a fragment of the human miR-181b promoter  
234 (nucleotides -1200 to +1) was amplified by PCR from human genomic DNA (forward:  
235 5'-TTGGGATACATATTTCACTAAC-3'; reverse: 5'-GAAGAGAAAGTCCTGGT-3'). The  
236 sequences used to detect miR-181b promoter activity are presented in Table 2. The PCR  
237 product was ligated into the pGL3-Basic vector (Promega, Madison, WI) at the KpnI and  
238 XhoI sites. Putative Smad3 binding elements (SBEs, -1091 to -1085 and -404 to -399) were  
239 found in the miR-181b promoter. Site-directed mutagenesis of the SBEs was performed by  
240 PCR using the Q5 Site-Directed Mutagenesis kit (New England Biolabs, catalog E0554).  
241 AEECs were transfected with *TransIT*®-LT1 transfection reagent (Mirus, catalog MIR2300)  
242 according to the manufacturer's protocol. Luciferase activity was measured with the  
243 luciferase assay kit (BioThema, catalog 484-001) and detected by a luminometer (Promega,  
244 GloMax® Luminometer).

### 245 **Immunohistochemistry**

246 Immunohistochemical analysis was performed with primary antibodies against TGF- $\beta$   
247 (Abcam, catalog ab64715, clone 9016), CD31 (Abcam, catalog ab28364) (abcam, catalog  
248 ab24590, clone P2B1), SMA (Abcam, catalog ab7817, clone 1A4) (Abcam, catalog ab5694),  
249 Twist (Abcam, catalog ab175430, clone 10E4E6) (Abcam, catalog ab50581), Snail (Cell  
250 Signaling Technology, catalog 3879, clone C15D3) , Slug (Cell Signaling Technology,  
251 catalog 9585, clone C19G7), Vimentin (Santa Cruz Biotechnology, catalog SC-6260, clone V9)



252 and Sema3A (Abnova, catalog H00010371-M01, clone 5G9) and with Alexa-488-conjugated  
253 (green) (Abcam, catalog ab150113) and Cy3-conjugated (red) (abcam, catalog ab97075)  
254 secondary antibodies. Nuclei were visualized by DAPI staining (Invitrogen, catalog P36935).  
255 Fluorescence was observed with a confocal microscope (Leica, Confocal TCS SP8XL) at the  
256 Microscope Core Laboratory of Chang-Gung Memorial Hospital. The fluorescence intensity  
257 was detected and calculated using “NIS Elements 4.30.00” imaging software from Nikon.

#### 258 **miR-181b chromogenic in situ hybridization.**

259 The cellular localization of miR-181b was investigated by chromogenic in situ hybridization  
260 (CISH) using a modified version of the RNA Scope 2.5 high-definition procedure (Advanced  
261 Cell Diagnostics [ACD], Hayward, CA, USA)(5, 6). In brief, 5- $\mu$ m thick paraffin sections  
262 from tissue samples were pretreated and hybridized with miRNAscope™ Probe-  
263 SR-hsa-miR-181b-3p-S1, targeting 2-20 of MIMAT0022692, (Advanced Cell Diagnostics,  
264 catalog 1075841-S1) targeting miR-181b overnight. The ZZ-pairs binding miR-181b were  
265 detected using seven amplification steps, including a Tyramid Signal Amplification step  
266 (TSA-DIG; PerkinElmer, catalog NEL748001KT, Skovlunde, Denmark) labeled with  
267 alkaline phosphatase-conjugated sheep anti-DIG FAB fragments (Roche, catalog  
268 11093274910, Basel, Switzerland), before visualized with Liquid Permanent Red (DAKO,  
269 catalog K0640, Glostrup, Denmark) and counterstained with Mayer’s hematoxylin. Data  
270 were collected using a using “NIS Elements 4.3.00” Imaging software from Nikon.

#### 271 **Systemic delivery of miR-181b antagomir or recombinant Seam3A**

272 Systemic antagomir delivery was achieved as described previously (7). Eight-week-old mice  
273 were injected through the tail vein with miR-181b-3p antagomir or miRNA nonspecific  
274 control twice a week for 4 weeks. In brief, 3  $\mu$ l of 1 nmol/ $\mu$ l miRNA nonspecific control or  
275 miR-181b-3p antagomir (Life Technologies, catalog MH20327) was mixed with 22  $\mu$ l  
276 Opti-MEM™ I Reduced-Serum Medium (Gibco, catalog 31985-070). Lipofectamine™  
277 RNAiMAX Transfection Reagent (20  $\mu$ l) (Invitrogen, catalog 13778-150) was mixed with

278 DPBS (5  $\mu$ l) (Gibco, catalog 14190-136) (solution 2) and placed at room temperature for 15  
279 min. Solutions 1 and 2 were then mixed by gentle pipetting. After incubation at room  
280 temperature for 30 min, the mixture added 50  $\mu$ l normal saline (100  $\mu$ l per mouse) was  
281 injected via the tail vein (**Figure 7A**). To investigate the potential therapeutic of Sema3A, the  
282 prepared recombinant sema3A (rSema3A) (Sino Biological, catalog 10758-H01H, Beijing,  
283 China). As previously sema3A intervention *In Vivo* studies(8, 9), eight-week-old mice were  
284 injected through the tail vein with rSema3A (1mg/kg body weight) or PBS (as control) twice  
285 a week for four weeks.

### 286 **Programmed electrical stimulation**

287 Twelve-week-old mice received programmed transesophageal electrical stimulation as  
288 previously described (4). Briefly, a 4 French electrode catheter (St. Jude Medical, MN, USA)  
289 connected to an isolated stimulator (IX-TA-220, iWork Systems Inc, WA, USA) was inserted  
290 through the esophagus of anaesthetized mice for atrial pacing. The pacing programs and EKG  
291 recordings were managed by LabScribe software (iWork Systems Inc, WA, USA). A stimulus  
292 amplitude of 1.5X diastolic capture threshold was used with a burst stimulus duration of 2 ms.  
293 A pretest burst was performed with a cycle length of 100 ms for 10 s to ensure the position  
294 and capture of atrial stimulation. Then, a pacing burst with a cycle length of 40 ms for 3 s  
295 was administered and repeated 10 times. AF was defined as rapid irregular atrial rhythm  
296 lasting longer than 3 s. AF inducibility was expressed as the ratio of pacing-triggered AF  
297 episodes/10 pacing bursts in each mouse. The AF duration was presented as the AF episode in  
298 each mouse (**Supplemental Figure 9**).

### 299 **Enzyme-linked immunosorbent assay (ELISA)**

300 Serum TGF- $\beta$  (Human, R&D System, DY240-05, Minneapolis, MN, USA) (Mouse, R&D  
301 System, DY1679-05, Minneapolis, MN, USA) protein level was evaluated using ELISAs,  
302 which were processed according to the manufacturer's instructions.

### 303 **Statistical analysis**

304 Statistical analysis was performed using GraphPad Prism 7.03 statistical software. Unless  
305 otherwise noted, data represent mean  $\pm$  SEM. 2-tailed Student's t test and one-way analysis of  
306 variance (ANOVA) with the post hoc (Dunnett's and Bonferroni's) test were applied for  
307 comparisons of 2 groups and multiple groups, respectively. The Fisher's exact test was used  
308 to compare categorical variables between groups. Linear regression test was used to compare  
309 correlation between groups. A P value less than 0.05 was considered significant. The original  
310 data files of the microarray and next-generation sequencing (NGS) have been deposited in  
311 Gene Expression Omnibus (<http://www.ncbi.nlm.gov/geo>) with the access number  
312 GSE156835 and GSE201318.

313

- 314 1. Nakajima H, Nakajima HO, Salcher O, Dittie AS, Dembowski K, Jing S, et al. Atrial  
315 but not ventricular fibrosis in mice expressing a mutant transforming growth  
316 factor-beta(1) transgene in the heart. *Circ Res*. 2000;86(5):571-9.
- 317 2. Verheule S, Sato T, Everett Tt, Engle SK, Otten D, Rubart-von der Lohe M, et al.  
318 Increased vulnerability to atrial fibrillation in transgenic mice with selective atrial  
319 fibrosis caused by overexpression of TGF-beta1. *Circ Res*. 2004;94(11):1458-65.
- 320 3. Sawada H, Saito T, Nickel NP, Alastalo TP, Glotzbach JP, Chan R, et al. Reduced  
321 BMP2 expression induces GM-CSF translation and macrophage recruitment in  
322 humans and mice to exacerbate pulmonary hypertension. *J Exp Med*.  
323 2014;211(2):263-80.
- 324 4. Chang SH, Yeh YH, Lee JL, Hsu YJ, Kuo CT, and Chen WJ. Transforming growth  
325 factor-beta-mediated CD44/STAT3 signaling contributes to the development of atrial  
326 fibrosis and fibrillation. *Basic Res Cardiol*. 2017;112(5):58.
- 327 5. Moldovan LI, Hansen TB, Veno MT, Okholm TLH, Andersen TL, Hager H, et al.  
328 High-throughput RNA sequencing from paired lesional- and non-lesional skin reveals  
329 major alterations in the psoriasis circRNAome. *BMC Med Genomics*. 2019;12(1):174.
- 330 6. Kristensen LS, Ebbesen KK, Sokol M, Jakobsen T, Korsgaard U, Eriksen AC, et al.  
331 Spatial expression analyses of the putative oncogene ciRS-7 in cancer reshape the  
332 microRNA sponge theory. *Nat Commun*. 2020;11(1):4551.
- 333 7. Sun X, Lin J, Zhang Y, Kang S, Belkin N, Wara AK, et al. MicroRNA-181b Improves  
334 Glucose Homeostasis and Insulin Sensitivity by Regulating Endothelial Function in  
335 White Adipose Tissue. *Circ Res*. 2016;118(5):810-21.
- 336 8. Hayashi M, Nakashima T, Taniguchi M, Kodama T, Kumanogoh A, and Takayanagi H.  
337 Osteoprotection by semaphorin 3A. *Nature*. 2012;485(7396):69-74.

- 338 9. Hu H, Xuan Y, Xue M, Cheng W, Wang Y, Li X, et al. Semaphorin 3A attenuates  
339 cardiac autonomic disorders and reduces inducible ventricular arrhythmias in rats with  
340 experimental myocardial infarction. *BMC Cardiovasc Disord.* 2016;16:16.

## 341 Supplemental Figures

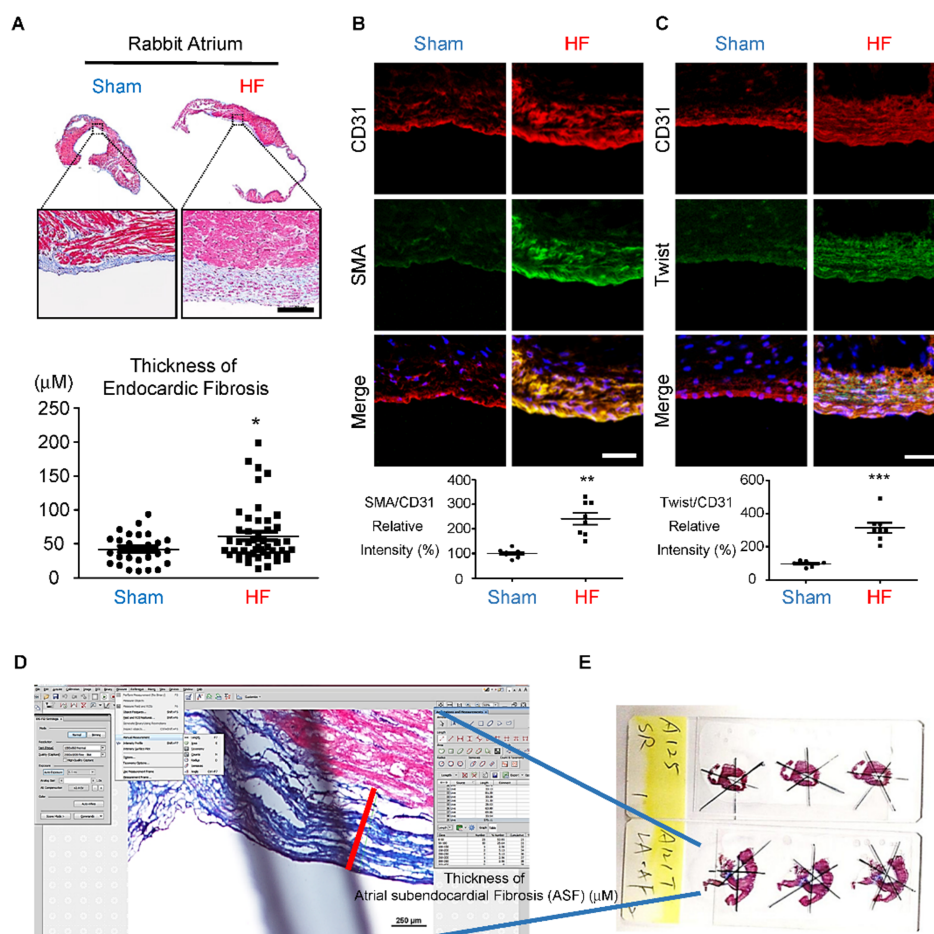

342

343 **Supplemental Figure 1. Histological analysis of atrial tissue. (A)** Rabbit atrial morphology  
 344 and trichrome staining of the endocardium. Scale bar: 100  $\mu\text{m}$ . Quantitative analysis of  
 345 endocardial fibrosis thickness. (n= 8). **(B)** Immunohistochemistry analysis of SMA and CD31  
 346 and **(C)** Twist and CD31 in the endocardium layer of rabbit heart failure (HF) atria.  
 347 Quantitation of SMA and Twist expression in the endocardium (CD31). Quantitative analysis  
 348 of the thickness of atrial subendocardial fibrosis (ASF) (n=8). **(B-C)** Data are presented as the  
 349 mean $\pm$ SEM. \* $p$ <0.05, \*\* $p$ <0.01, \*\*\* $p$ <0.001 versus sham were obtained by 2-tailed  
 350 Student's t test. **(D)** Trichrome staining of subendocardial fibrosis shows collagen (blue)  
 351 deposition in the endocardium. Quantitative analysis of the thickness of collagen deposits by  
 352 the length of fibrotic area. Thickness of atrial subendocardial fibrosis (ASF) was defined as  
 353 the distance between the elastic laminae to fibrotic lumen. **(E)** All atrial sections were divided  
 354 randomly into 6 fields, and trichrome-stained thickness of ASF was measured.

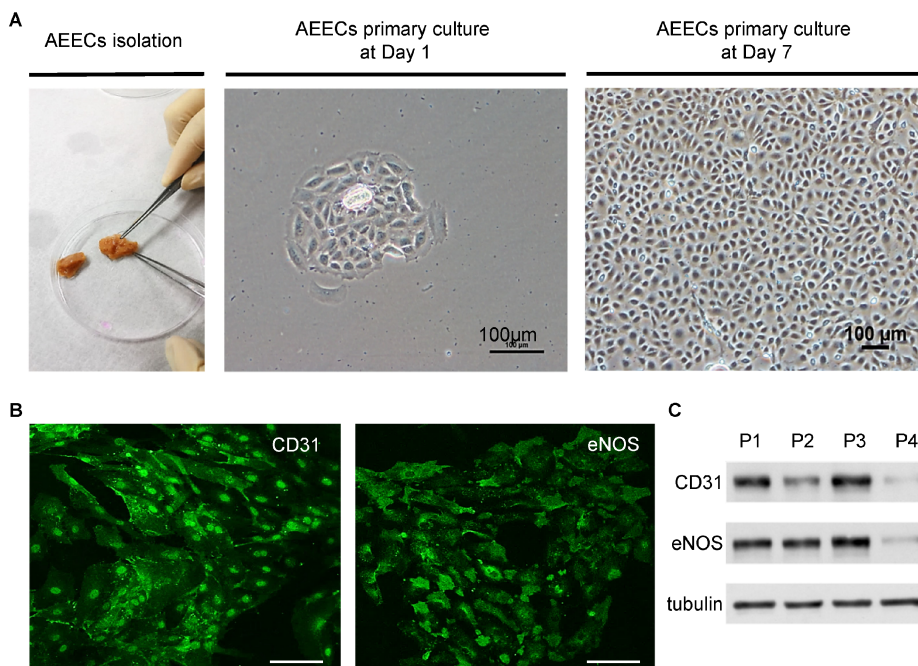

355

356 **Supplemental Figure 2. Isolation and initial characterization of human AEECs**

357 **(A)** The AEECs was isolated from AF patients, the phase contrast images show the  
 358 morphology of AEECs in adherent culture at Day 1, and Day 7. The images were obtained  
 359 using 20X and 10X objectives. **(B)** The primary culture AEECs were identified by the  
 360 endothelial-specific markers CD31, and eNOS to characterize the AEECs. **(C)**. All  
 361 endothelial-specific markers are down-regulated at passage 4. Therefore, the AEECs were  
 362 utilized before passage 4 for the in vitro experiments.

363

364

365

366

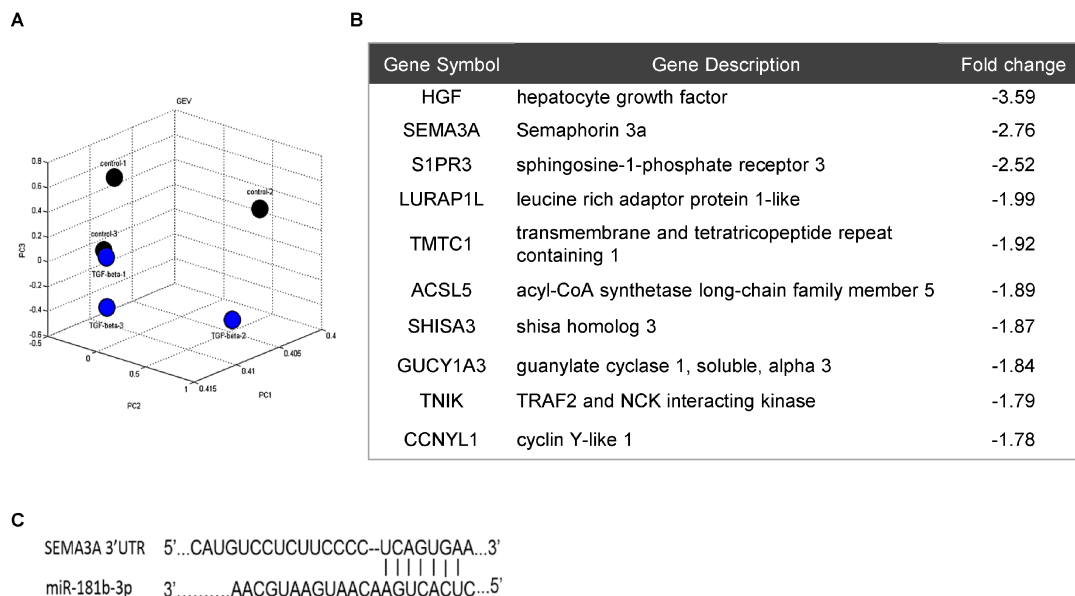

367

368 **Supplemental Figure 3. Microarray data generation and analysis**

369 (A) AEECs were treated without (black) or with (blue) 5 ng/ml TGF- $\beta$  and compared by  
 370 microarray analysis. The three-dimensional projection of the principal component analysis  
 371 (PCA) shows separation between the two groups. (B) Expression profiles of the top 10  
 372 downregulated genes related to miR-181b in the hAEEC response to TGF- $\beta$ . (C) Sema3a is a  
 373 target of miR-181b. Schematic diagram of human Sema3a 3' UTR containing the predicted  
 374 conserved miR-181b binding site.

375

376

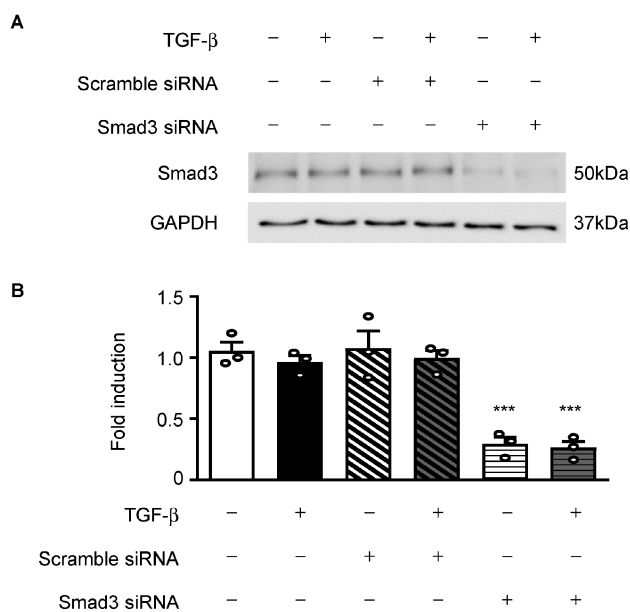

377

378

#### 379 **Supplemental Figure 4. Smad3 siRNA knockdown efficiency**

380 AEECs were transfected with Smad3 siRNA or control nontargeting siRNA (scrambled  
 381 siRNA) and treated with or without TGF- $\beta$ . Representative immunoblot (**A**) and  
 382 densitometric quantification (**B**) of protein expression after siRNA transfection. Data are  
 383 presented as the mean $\pm$ SEM. (n=3 per group), \*\*\*p<0.001 versus the scrambled siRNA only  
 384 group were obtained by 1-way ANOVA with Dunnett's post hoc test.

385



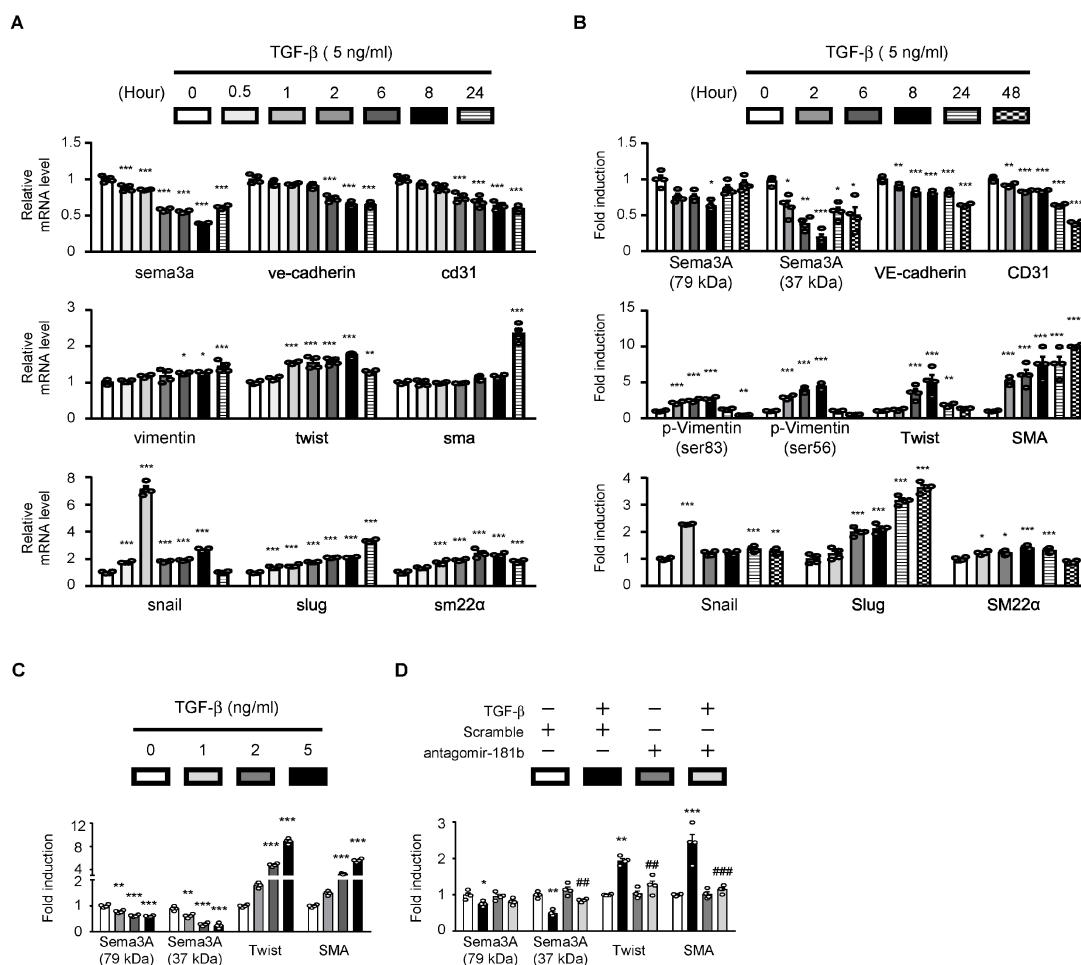

386

387 **Supplemental Figure 5. The quantitative data of miR-181b targets Sema3a, and TGF- $\beta$** 388 **induces EndMT markers. (A)** human AEECs were growth-arrested in starvation medium389 (0.1% FBS) and then stimulated with 5 ng/ml TGF- $\beta$  and mRNAs measured by qRT-PCR390 relative to GAPDH at time points up to 48h. TGF- $\beta$  decreased sema3a, ve-cadherin, and cd31391 and increased EndMT markers in AEECs. GAPDH was used as the loading control. \* $p < 0.05$ ,392 \*\* $p < 0.01$ , \*\*\* $p < 0.001$  versus the untreated group were obtained by 1-way ANOVA with393 Dunnett's post hoc test. **(B)** Representative quantitative data of western immunoblots in394 AEECs treated with 5 ng/ml TGF- $\beta$  are showed increased Vimentin, Twist and SMA levels395 but decreased Sema3A levels at time points up to 48 h. TGF- $\beta$  increased Twist expression at 8

396 h and SMA expression at 2 to 48 h and decreased Sema3A expression at 2 to 8 h in AEECs.

397 GAPDH was used as the loading control. \* $p < 0.05$ , \*\* $p < 0.01$ , \*\*\* $p < 0.001$  versus the  
398 untreated group were obtained by 1-way ANOVA with Dunnett's post hoc test. **(C)**  
399 Representative quantitative data of western immunoblots are shown AEECs were incubated  
400 with or without TGF- $\beta$  (0, 1, 2, or 5 ng/ml). TGF- $\beta$  increased Twist and SMA at 2 and 5  
401 ng/ml and decreased Sema3A in a dose-dependent manner at 8 h. GAPDH was used as the  
402 loading control. \* $p < 0.05$ , \*\* $p < 0.01$ , \*\*\* $p < 0.001$  versus the untreated group were obtained by  
403 1-way ANOVA with Dunnett's post hoc test. **(D)**. AEECs were transfected with miR-181b  
404 antagomir (antagomir-181b) or scrambled control miRNA and then treated with or without  
405 TGF- $\beta$  (5 ng/ml). Representative quantification of protein expression in immunoblot.  
406 \* $p < 0.05$ , \*\* $p < 0.01$ , \*\*\* $p < 0.001$  versus the scrambled miRNA group without TGF- $\beta$ ;  
407 ### $p < 0.01$ , #### $p < 0.001$ , TGF- $\beta$ + scramble group versus the TGF- $\beta$ + antagomir-181b group  
408 were obtained by 1-way ANOVA with Bonferroni's post hoc test.

409

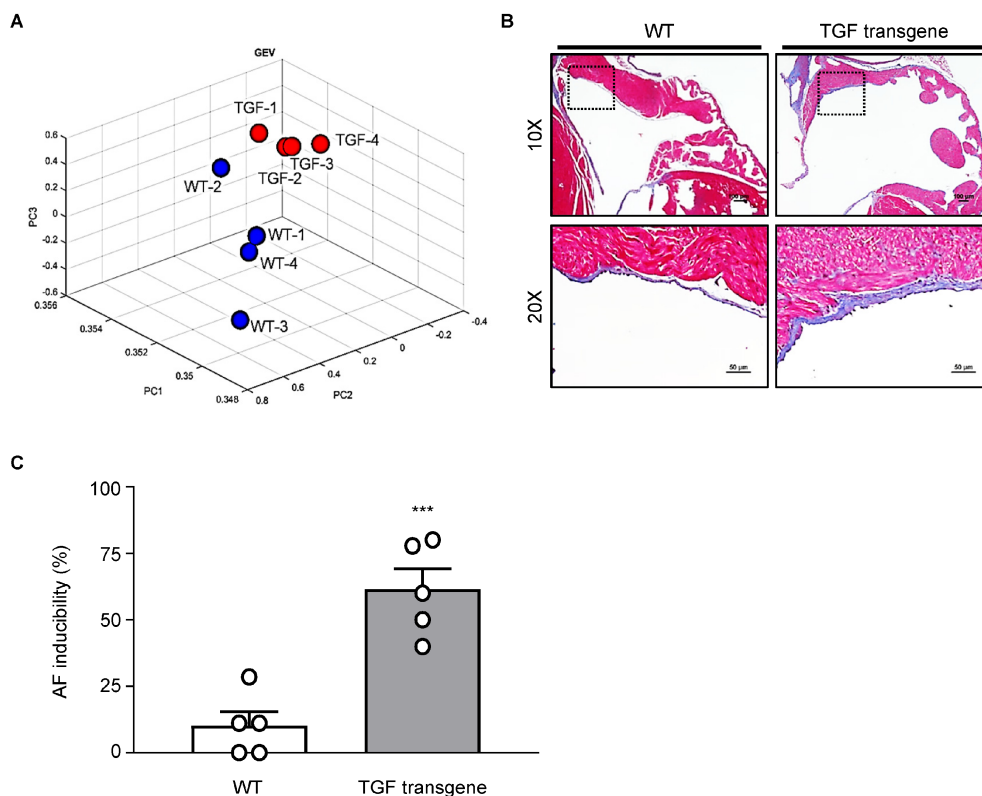

410

411 **Supplemental Figure 6. Histological analysis of trichrome-stained atrial tissue of**  
 412 **transgenic mice with cardiac-specific TGF-β overexpression.**

413 (A) Atrial tissue lysates from TGF-β transgenic mice (Red) and WT mice (blue) were  
 414 analyzed and compared by next-generation sequencing. The three-dimensional projection of  
 415 the principal component analysis (PCA) shows separation between the two groups. (B) Atrial  
 416 tissue of TGF-β transgenic mice (TGF transgene) morphology in cross-sections and showed  
 417 greater collagen (blue) deposition in the endocardium of TGF-β transgenic mice tissue than in  
 418 that of WT tissue. Scale bar= 100 and 50 μm. (C) AF inducibility in TGF-β transgenic mice  
 419 or WT mice (n=5), \*\*\*P<0.001 versus WT were obtained by 2-tailed Student's t test.

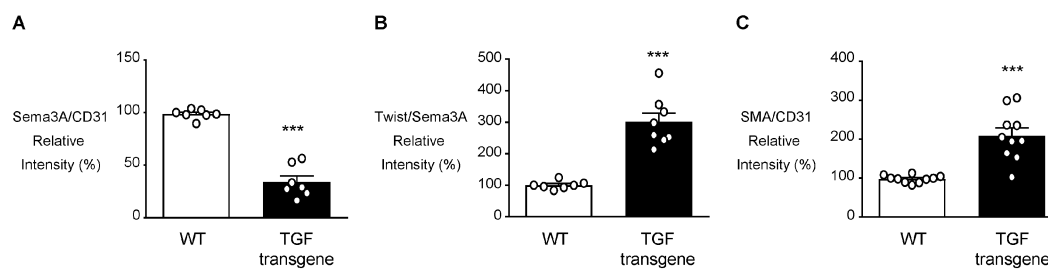

420

421 **Supplemental Figure 7. Quantitative analyses of immunofluorescent staining for**  
 422 **Sema3A, Twist, and SMA contained in CD31+ ECs in the endocardium.**

423 (A) Quantitation of Sema3A and CD31 expression (B) Quantitation of Twist and Sema3A  
 424 expression, (C) Quantitation of SMA expression and CD31 intensity in the endocardium layer  
 425 of atria. (A-C) Data are presented as the mean±SEM (n=10 per group); \*\*\*p<0.001 versus  
 426 WT were obtained by 2-tailed Student's t test.

427

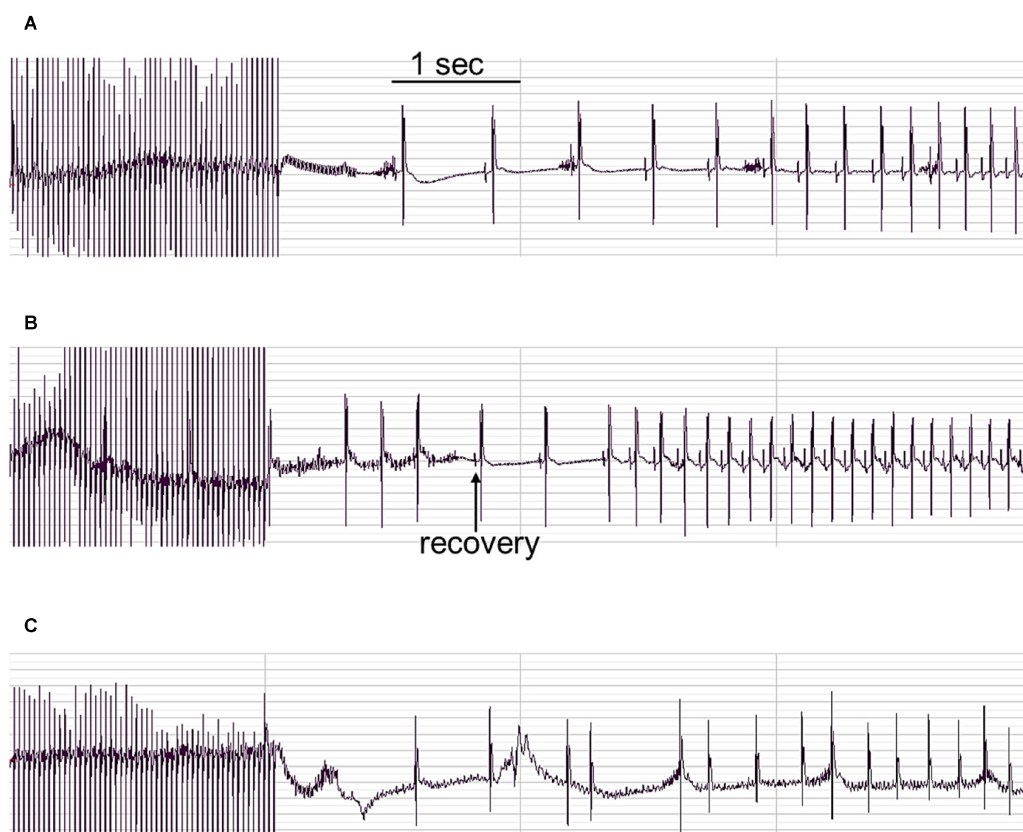

428

429 **Supplemental Figure 8.** Representative EKG tracing after 25-Hz burst pacing: (A) Sinus

430 rhythm, (B) Non-sustained atrial fibrillation (AF), and (C) Sustained AF. The duration of AF

431 was defined as the average of AF duration after burst pacing for 10 times in each mouse. The

432 inducibility of AF was defined as the AF episode lasting for more than 3 seconds after burst

433 pacing for 10 times in each mouse.

434

435

436

437

438

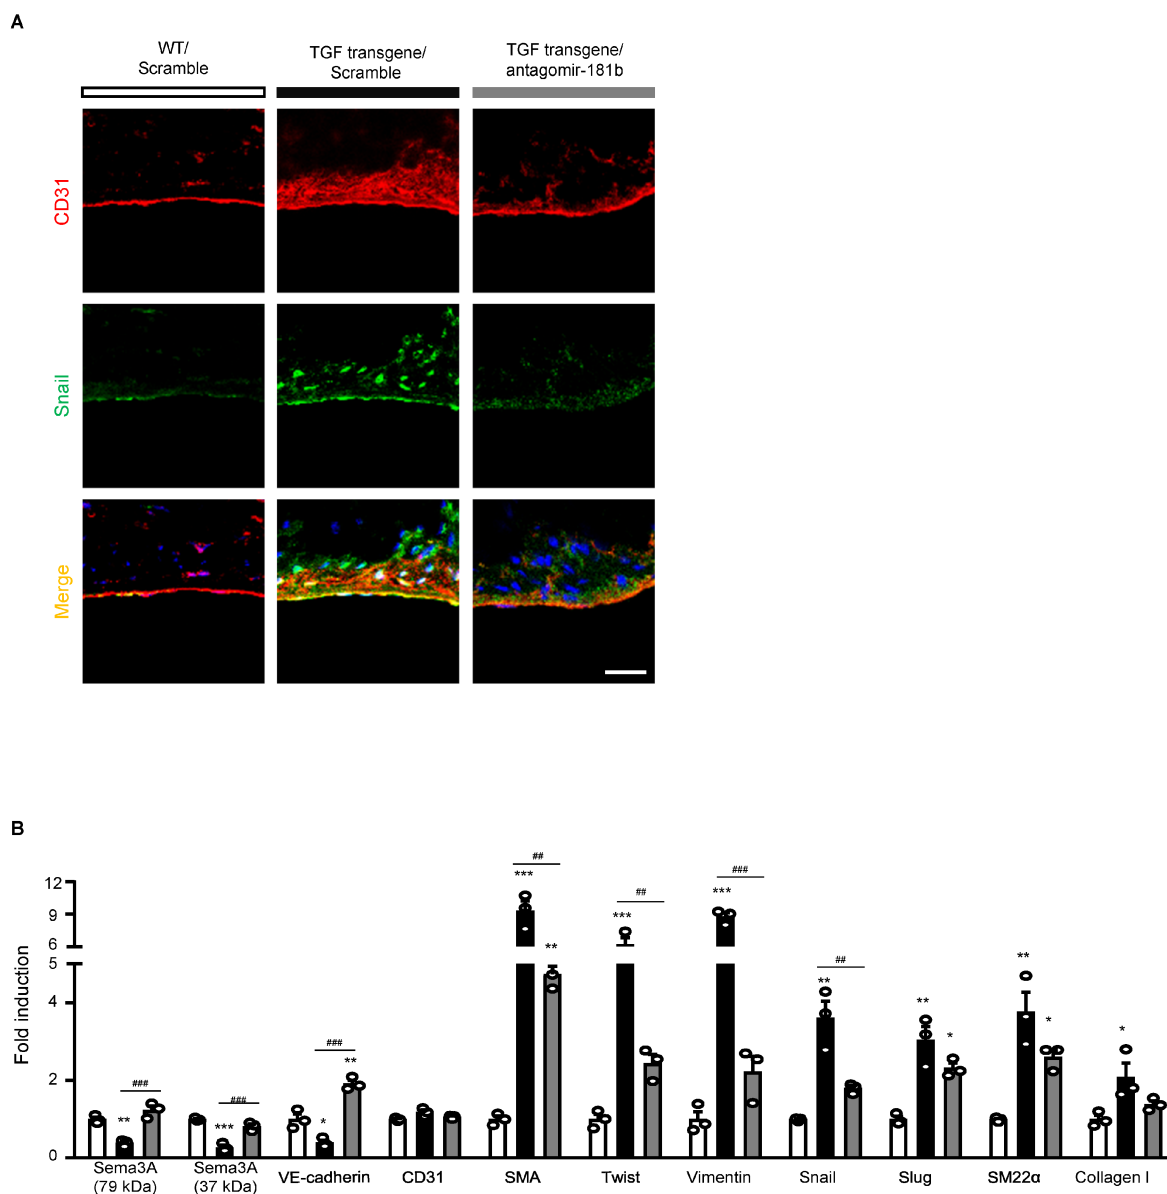

439

440 **Supplemental Figure 9.** The miR-181b antagomir blocks EndMT markers and reverses  
 441 Sema3A. **(A)** Immunohistochemistry analysis of CD31 with Snail in the endocardium (scale  
 442 bar: 20  $\mu$ m; n=5). **(B)** Representative quantitative data of Western blot analysis proteins in  
 443 atrial tissue from WT, TGF- $\beta$  transgenic (TGF transgene) and TGF- $\beta$  transgenic mice (TGF  
 444 transgene) with antagomir-181b treatment. are showed increased SMA, Twist, Vimentin,  
 445 Snail, Slug, SM22 $\alpha$  and Collagen I levels but decreased Sema3A and VE-cadherin levels in  
 446 TGF- $\beta$  transgenic mice group compared with WT. TGF- $\beta$  transgenic mice with  
 447 antagomir-181b treatment reverse Sema3A and VE-cadherin protein and reduced EndMT  
 448 markers. n=3, \*p<0.05, \*\*p<0.01, \*\*\*p<0.001 versus the WT with scramble group; ###p<0.01,  
 449 ####p<0.001, TGF- $\beta$  transgenic mice versus TGF- $\beta$  transgenic mice with antagomir-181b  
 450 treatment group were obtained by 1-way ANOVA with Bonferroni's post hoc test.

451

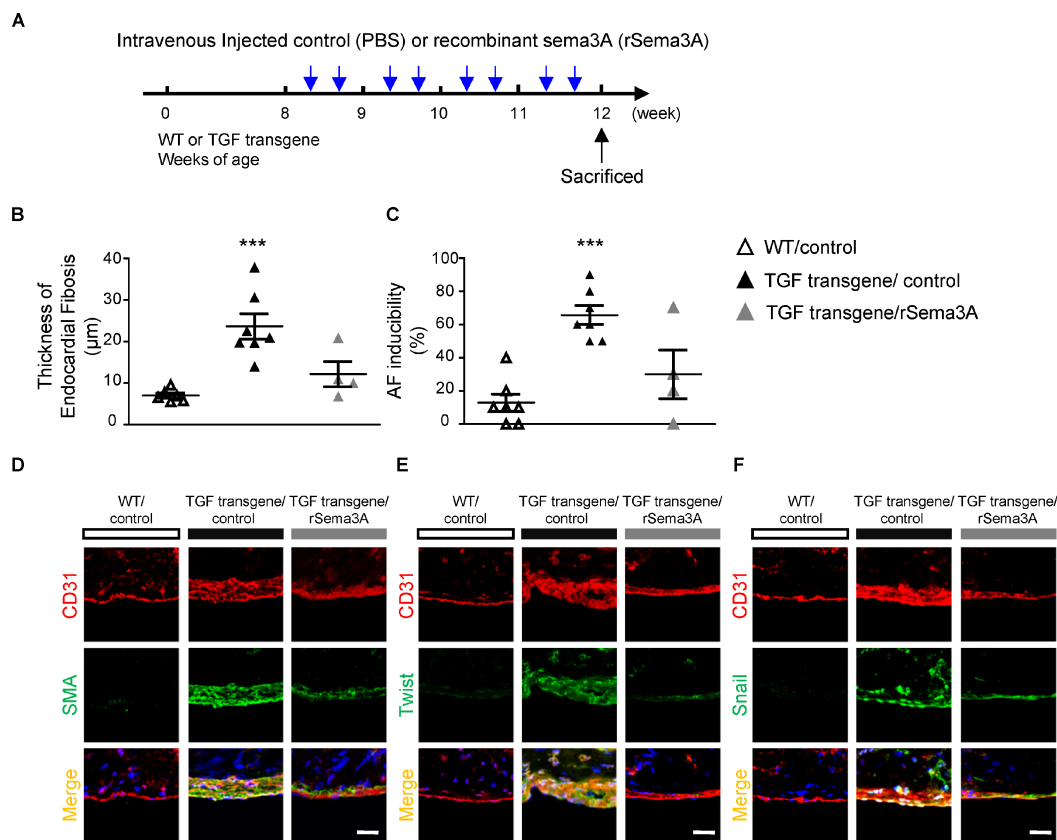

452

453 **Supplemental Figure 10. Sema3A as a potential AF therapeutic agent**

454 (A) Design and optimization of the appropriate treatment strategy. (B) Quantitative analysis  
 455 of endocardial fibrosis thickness, (C) AF inducibility. (B-C) Data are presented as the  
 456 mean±SEM (n= 4-7 per group); \*\*\*p<0.001 versus WT/control were obtained by 1-way  
 457 ANOVA with Bonferroni's post hoc Test. (D) (E) (F) Immunohistochemistry analysis of  
 458 CD31 with SMA, Twist and Snail in the endocardium (scale bar: 20 µm; n=4-5).

459

460

461

462

463

464

465 Supplemental table. 1 the gene list from the Human Transcriptome Array 2.0 data

| GeneSymbol | Gene Description                                                                          | Fold change | p value |
|------------|-------------------------------------------------------------------------------------------|-------------|---------|
| ADH1B      | alcohol dehydrogenase 1B (class I), beta polypeptide                                      | -20.44      | 0.026   |
| ADAMTS1    | ADAM metalloproteinase with thrombospondin type 1 motif,<br>1                             | -3.81       | 0.017   |
| ADAMTS9    | ADAM metalloproteinase with thrombospondin type 1 motif,<br>9                             | -3.75       | 0.045   |
| HGF        | hepatocyte growth factor (hepapoietin A; scatter factor)                                  | -3.59       | 0.004   |
| SPRY1      | sprouty homolog 1, antagonist of FGF signaling (Drosophila)                               | -3.39       | 0.035   |
| PCDH18     | protocadherin 18                                                                          | -3.35       | 0.049   |
| TMEM88     | transmembrane protein 88                                                                  | -2.82       | 0.024   |
| TRIM25     | tripartite motif containing 25                                                            | -2.80       | 0.029   |
| CYGB       | cytoglobin                                                                                | -2.78       | 0.027   |
| SEMA3A     | sema domain, immunoglobulin domain (Ig), short basic<br>domain, secreted, (semaphorin) 3A | -2.76       | 0.004   |
| IFI6       | interferon, alpha-inducible protein 6                                                     | -2.57       | 0.015   |
| ALDH1A3    | aldehyde dehydrogenase 1 family, member A3                                                | -2.54       | 0.028   |
| S1PR3      | sphingosine-1-phosphate receptor 3                                                        | -2.52       | 0.012   |
| MAP3K5     | mitogen-activated protein kinase kinase kinase 5                                          | -2.40       | 0.040   |
| KITLG      | KIT ligand                                                                                | -2.34       | 0.026   |
| MYRIP      | myosin VIIA and Rab interacting protein                                                   | -2.34       | 0.046   |
| FGL2       | fibrinogen-like 2                                                                         | -2.33       | 0.033   |
| PHLDA1     | pleckstrin homology-like domain, family A, member 1                                       | -2.33       | 0.038   |
| SMAD3      | SMAD family member 3                                                                      | -2.31       | 0.023   |
| NPY1R      | neuropeptide Y receptor Y1                                                                | -2.27       | 0.007   |



|           |                                                                                    |       |       |
|-----------|------------------------------------------------------------------------------------|-------|-------|
| CITED2    | Cbp/p300-interacting transactivator, with Glu/Asp-rich carboxy-terminal domain, 2  | -2.24 | 0.027 |
| EDNRB     | endothelin receptor type B                                                         | -2.22 | 0.039 |
| TNFAIP3   | tumor necrosis factor, alpha-induced protein 3                                     | -2.21 | 0.015 |
| ZFP36     | ZFP36 ring finger protein                                                          | -2.20 | 0.025 |
| EBF2      | early B-cell factor 2                                                              | -2.14 | 0.039 |
| CNKSR3    | CNKSR family member 3                                                              | -2.13 | 0.038 |
| HSPB6     | heat shock protein, alpha-crystallin-related, B6                                   | -2.12 | 0.046 |
| RNF144B   | ring finger protein 144B                                                           | -2.08 | 0.005 |
| UST       | uronyl-2-sulfotransferase                                                          | -2.07 | 0.024 |
| PIEZO2    | piezo-type mechanosensitive ion channel component 2                                | -2.06 | 0.004 |
| CCDC102B  | coiled-coil domain containing 102B                                                 | -2.04 | 0.021 |
| OAS3      | 2'-5'-oligoadenylate synthetase 3, 100kDa                                          | -2.02 | 0.019 |
| GGT5      | gamma-glutamyltransferase 5                                                        | -2.01 | 0.042 |
| MX1       | myxovirus (influenza virus) resistance 1, interferon-inducible protein p78 (mouse) | -2.01 | 0.031 |
| SQRDL     | sulfide quinone reductase-like (yeast)                                             | -2.00 | 0.017 |
| SAMHD1    | SAM domain and HD domain 1                                                         | -2.00 | 0.049 |
| HIST1H2BM | histone cluster 1, H2bm                                                            | -2.00 | 0.011 |
| FLOT1     | flotillin 1                                                                        | -2.00 | 0.024 |
| GUCY1B3   | guanylate cyclase 1, soluble, beta 3                                               | -1.99 | 0.030 |
| LURAP1L   | leucine rich adaptor protein 1-like                                                | -1.99 | 0.016 |
| EPDR1     | ependymin related protein 1 (zebrafish)                                            | -1.98 | 0.001 |
| ADH1C     | alcohol dehydrogenase 1C (class I), gamma polypeptide                              | -1.98 | 0.030 |
| CTSL1     | cathepsin L1                                                                       | -1.96 | 0.026 |

|          |                                                                        |       |       |
|----------|------------------------------------------------------------------------|-------|-------|
| IFITM4P  | interferon induced transmembrane protein 4 pseudogene                  | -1.94 | 0.035 |
| LRIG3    | leucine-rich repeats and immunoglobulin-like domains 3                 | -1.94 | 0.037 |
| IL13RA2  | interleukin 13 receptor, alpha 2                                       | -1.93 | 0.023 |
| TCN2     | transcobalamin II                                                      | -1.92 | 0.049 |
| TMTC1    | transmembrane and tetratricopeptide repeat containing 1                | -1.92 | 0.020 |
| EPS8     | epidermal growth factor receptor pathway substrate 8                   | -1.91 | 0.026 |
| APOBEC3B | apolipoprotein B mRNA editing enzyme, catalytic polypeptide-like 3B    | -1.90 | 0.020 |
| PTGER4   | prostaglandin E receptor 4 (subtype EP4)                               | -1.90 | 0.030 |
| ID4      | inhibitor of DNA binding 4, dominant negative helix-loop-helix protein | -1.90 | 0.000 |
| PDLIM1   | PDZ and LIM domain 1                                                   | -1.90 | 0.001 |
| EPSTI1   | epithelial stromal interaction 1 (breast)                              | -1.89 | 0.003 |
| ACSL5    | acyl-CoA synthetase long-chain family member 5                         | -1.89 | 0.015 |
| APOBEC3D | apolipoprotein B mRNA editing enzyme, catalytic polypeptide-like 3D    | -1.89 | 0.023 |
| SHISA3   | shisa homolog 3 ( <i>Xenopus laevis</i> )                              | -1.87 | 0.047 |
| TNFRSF1B | tumor necrosis factor receptor superfamily, member 1B                  | -1.87 | 0.029 |
| FAM129A  | family with sequence similarity 129, member A                          | -1.86 | 0.037 |
| KCTD12   | potassium channel tetramerisation domain containing 12                 | -1.86 | 0.007 |
| CDCA7L   | cell division cycle associated 7-like                                  | -1.85 | 0.001 |
| GATA4    | GATA binding protein 4                                                 | -1.85 | 0.009 |
| FLOT2    | flotillin 2                                                            | -1.84 | 0.015 |
| GUCY1A3  | guanylate cyclase 1, soluble, alpha 3                                  | -1.84 | 0.019 |
| SAT1     | spermidine/spermine N1-acetyltransferase 1                             | -1.83 | 0.012 |

|           |                                                                                         |       |       |
|-----------|-----------------------------------------------------------------------------------------|-------|-------|
| NID2      | nidogen 2 (osteonidogen)                                                                | -1.83 | 0.042 |
| NID1      | nidogen 1                                                                               | -1.81 | 0.040 |
| ATP2B4    | ATPase, Ca <sup>++</sup> transporting, plasma membrane 4                                | -1.81 | 0.011 |
| ALDH6A1   | aldehyde dehydrogenase 6 family, member A1                                              | -1.81 | 0.034 |
| USP18     | ubiquitin specific peptidase 18                                                         | -1.80 | 0.006 |
| BLVRB     | biliverdin reductase B (flavin reductase (NADPH))                                       | -1.79 | 0.047 |
| TNIK      | TRAF2 and NCK interacting kinase                                                        | -1.79 | 0.022 |
| CCNB2     | cyclin B2                                                                               | -1.78 | 0.036 |
| CCNYL1    | cyclin Y-like 1                                                                         | -1.78 | 0.040 |
| ATP5D     | ATP synthase, H <sup>+</sup> transporting, mitochondrial F1 complex, delta subunit      | -1.78 | 0.011 |
| HCP5      | HLA complex P5 (non-protein coding)                                                     | -1.77 | 0.036 |
| PLA2G16   | phospholipase A2, group XVI                                                             | -1.77 | 0.031 |
| RAPH1     | Ras association (RalGDS/AF-6) and pleckstrin homology domains 1                         | -1.77 | 0.009 |
| TMEM106C  | transmembrane protein 106C                                                              | -1.74 | 0.042 |
| ADIRF     | adipogenesis regulatory factor                                                          | -1.74 | 0.049 |
| APOBEC3C  | apolipoprotein B mRNA editing enzyme, catalytic polypeptide-like 3C                     | -1.74 | 0.013 |
| ADH1A     | alcohol dehydrogenase 1A (class I), alpha polypeptide                                   | -1.72 | 0.029 |
| RAC2      | ras-related C3 botulinum toxin substrate 2 (rho family, small GTP binding protein Rac2) | -1.72 | 0.030 |
| TBC1D8    | TBC1 domain family, member 8 (with GRAM domain)                                         | -1.71 | 0.024 |
| GIPC2     | GIPC PDZ domain containing family, member 2                                             | -1.70 | 0.027 |
| HIST1H2BI | histone cluster 1, H2bi                                                                 | -1.70 | 0.045 |

|           |                                                      |       |       |
|-----------|------------------------------------------------------|-------|-------|
| SNHG8     | small nucleolar RNA host gene 8 (non-protein coding) | -1.69 | 0.014 |
| RPS3AP47  | ribosomal protein S3a pseudogene 47                  | -1.69 | 0.004 |
| CA12      | carbonic anhydrase XII                               | -1.68 | 0.029 |
| SLIT2     | slit homolog 2 (Drosophila)                          | -1.68 | 0.029 |
| STEAP1B   | STEAP family member 1B                               | -1.68 | 0.034 |
| COLEC12   | collectin sub-family member 12                       | -1.68 | 0.039 |
| ZNF366    | zinc finger protein 366                              | -1.68 | 0.004 |
| ICAM2     | intercellular adhesion molecule 2                    | -1.67 | 0.023 |
| GSTM4     | glutathione S-transferase mu 4                       | -1.67 | 0.049 |
| EVA1C     | eva-1 homolog C (C. elegans)                         | -1.66 | 0.001 |
| TJP2      | tight junction protein 2                             | -1.66 | 0.002 |
| GPM6B     | glycoprotein M6B                                     | -1.66 | 0.012 |
| FNBP1     | formin binding protein 1                             | -1.66 | 0.034 |
| CDK4      | cyclin-dependent kinase 4                            | -1.65 | 0.011 |
| RNU5F-1   | RNA, U5F small nuclear 1                             | -1.65 | 0.021 |
| EPHX1     | epoxide hydrolase 1, microsomal (xenobiotic)         | -1.65 | 0.028 |
| C19orf54  | chromosome 19 open reading frame 54                  | -1.65 | 0.036 |
| FLI1-AS1  | FLI1 antisense RNA 1                                 | -1.64 | 0.037 |
| SNAI2     | snail family zinc finger 2                           | -1.64 | 0.028 |
| FOSL1     | FOS-like antigen 1                                   | -1.64 | 0.024 |
| IFITM2    | interferon induced transmembrane protein 2           | -1.64 | 0.046 |
| PLCE1-AS1 | PLCE1 antisense RNA 1                                | -1.64 | 0.030 |
| SNORD14D  | small nucleolar RNA, C/D box 14D                     | -1.64 | 0.023 |
| AK5       | adenylate kinase 5                                   | -1.64 | 0.008 |
| PNPO      | pyridoxamine 5'-phosphate oxidase                    | -1.63 | 0.025 |

|          |                                                                                     |       |       |
|----------|-------------------------------------------------------------------------------------|-------|-------|
| DUSP6    | dual specificity phosphatase 6                                                      | -1.63 | 0.023 |
| KAT2B    | K(lysine) acetyltransferase 2B                                                      | -1.63 | 0.003 |
| ZCCHC2   | zinc finger, CCHC domain containing 2                                               | -1.62 | 0.003 |
| LDB2     | LIM domain binding 2                                                                | -1.62 | 0.025 |
| IL18R1   | interleukin 18 receptor 1                                                           | -1.62 | 0.012 |
| APOL6    | apolipoprotein L, 6                                                                 | -1.62 | 0.034 |
| LMO3     | LIM domain only 3 (rhombotin-like 2)                                                | -1.61 | 0.013 |
| NFKBIA   | nuclear factor of kappa light polypeptide gene enhancer in B-cells inhibitor, alpha | -1.61 | 0.021 |
| SLC43A3  | solute carrier family 43, member 3                                                  | -1.61 | 0.021 |
| IRF2     | interferon regulatory factor 2                                                      | -1.61 | 0.042 |
| SLCO2A1  | solute carrier organic anion transporter family, member 2A1                         | -1.61 | 0.037 |
| RNF213   | ring finger protein 213                                                             | -1.61 | 0.030 |
| UCP2     | uncoupling protein 2 (mitochondrial, proton carrier)                                | -1.60 | 0.044 |
| IL33     | interleukin 33                                                                      | -1.60 | 0.000 |
| CD34     | CD34 molecule                                                                       | -1.60 | 0.009 |
| HIST1H3H | histone cluster 1, H3h                                                              | -1.60 | 0.016 |
| PSMB9    | proteasome (prosome, macropain) subunit, beta type, 9                               | -1.60 | 0.036 |
| PSMB9    | proteasome (prosome, macropain) subunit, beta type, 9                               | -1.60 | 0.036 |
| TYMS     | thymidylate synthetase                                                              | -1.60 | 0.050 |
| PSMB9    | proteasome (prosome, macropain) subunit, beta type, 9                               | -1.60 | 0.035 |
| PAG1     | phosphoprotein associated with glycosphingolipid microdomains 1                     | -1.60 | 0.030 |
| CASP10   | caspase 10, apoptosis-related cysteine peptidase                                    | -1.59 | 0.032 |
| AHNAK    | AHNAK nucleoprotein                                                                 | -1.59 | 0.039 |

|              |                                                                                    |       |       |
|--------------|------------------------------------------------------------------------------------|-------|-------|
| TPX2         | TPX2, microtubule-associated, homolog ( <i>Xenopus laevis</i> )                    | -1.59 | 0.030 |
| TSPAN18      | tetraspanin 18                                                                     | -1.59 | 0.047 |
| CTC1         | CTS telomere maintenance complex component 1                                       | -1.58 | 0.016 |
| IL1RL1       | interleukin 1 receptor-like 1                                                      | -1.58 | 0.023 |
| SVILP1       | supervillin pseudogene 1                                                           | -1.58 | 0.034 |
| AIM1         | absent in melanoma 1                                                               | -1.57 | 0.028 |
| FERMT3       | fermitin family member 3                                                           | -1.57 | 0.038 |
| ITPK1        | inositol-tetrakisphosphate 1-kinase                                                | -1.57 | 0.048 |
| MTRNR2L1     | MT-RNR2-like 1                                                                     | -1.56 | 0.006 |
| ETS2         | v-ets erythroblastosis virus E26 oncogene homolog 2 (avian)                        | -1.56 | 0.049 |
| ARL2         | ADP-ribosylation factor-like 2                                                     | -1.56 | 0.003 |
| CAMK1        | calcium/calmodulin-dependent protein kinase I                                      | -1.56 | 0.001 |
| FIG4         | FIG4 homolog, SAC1 lipid phosphatase domain containing<br>( <i>S. cerevisiae</i> ) | -1.56 | 0.041 |
| MAFB         | v-maf musculoaponeurotic fibrosarcoma oncogene homolog<br>B (avian)                | -1.55 | 0.013 |
| ADAM15       | ADAM metallopeptidase domain 15                                                    | -1.55 | 0.009 |
| CD47         | CD47 molecule                                                                      | -1.55 | 0.006 |
| SRPX         | sushi-repeat containing protein, X-linked                                          | -1.55 | 0.036 |
| TRERF1       | transcriptional regulating factor 1                                                | -1.55 | 0.007 |
| FGD5         | FYVE, RhoGEF and PH domain containing 5                                            | -1.54 | 0.026 |
| OSR1         | odd-skipped related 1 ( <i>Drosophila</i> )                                        | -1.54 | 0.004 |
| LIN7A        | lin-7 homolog A ( <i>C. elegans</i> )                                              | -1.54 | 0.004 |
| REPS1        | RALBP1 associated Eps domain containing 1                                          | -1.54 | 0.025 |
| LOC100129518 | uncharacterized LOC100129518                                                       | -1.53 | 0.034 |

|             |                                                                                  |       |       |
|-------------|----------------------------------------------------------------------------------|-------|-------|
| SLC50A1     | solute carrier family 50 (sugar transporter), member 1                           | -1.53 | 0.026 |
| LOC729603   | calcium binding protein P22 pseudogene                                           | -1.52 | 0.039 |
| ARHGEF3     | Rho guanine nucleotide exchange factor (GEF) 3                                   | -1.52 | 0.013 |
| ZNF319      | zinc finger protein 319                                                          | -1.52 | 0.024 |
| HIST3H2A    | histone cluster 3, H2a                                                           | -1.52 | 0.044 |
| USP41       | ubiquitin specific peptidase 41                                                  | -1.52 | 0.008 |
| FTL         | ferritin, light polypeptide                                                      | -1.52 | 0.041 |
| SMAP2       | small ArfGAP2                                                                    | -1.51 | 0.038 |
| MMAB        | methylmalonic aciduria (cobalamin deficiency) cblB type                          | -1.51 | 0.015 |
| SLC7A8      | solute carrier family 7 (amino acid transporter light chain, L system), member 8 | -1.51 | 0.047 |
| HSBP1L1     | heat shock factor binding protein 1-like 1                                       | -1.51 | 0.012 |
| MGST1       | microsomal glutathione S-transferase 1                                           | -1.51 | 0.007 |
| OXA1L       | oxidase (cytochrome c) assembly 1-like                                           | -1.50 | 0.031 |
| CLEC14A     | C-type lectin domain family 14, member A                                         | -1.50 | 0.006 |
| ARHGAP6     | Rho GTPase activating protein 6                                                  | -1.50 | 0.030 |
| ANKRD10-IT1 | ANKRD10 intronic transcript 1 (non-protein coding)                               | 1.50  | 0.018 |
| SEC23A      | Sec23 homolog A ( <i>S. cerevisiae</i> )                                         | 1.50  | 0.047 |
| GEM         | GTP binding protein overexpressed in skeletal muscle                             | 1.50  | 0.007 |
| RALA        | v-ral simian leukemia viral oncogene homolog A (ras related)                     | 1.50  | 0.020 |
| SLFN5       | schlafen family member 5                                                         | 1.51  | 0.002 |
| PACS1       | phosphofurin acidic cluster sorting protein 1                                    | 1.51  | 0.033 |
| ACBD3       | acyl-CoA binding domain containing 3                                             | 1.52  | 0.015 |
| RNU7-37P    | RNA, U7 small nuclear 37 pseudogene                                              | 1.52  | 0.035 |
| ZNF432      | zinc finger protein 432                                                          | 1.52  | 0.002 |

|            |                                                                                                   |      |       |
|------------|---------------------------------------------------------------------------------------------------|------|-------|
| MYO1D      | myosin ID                                                                                         | 1.53 | 0.006 |
| SIPA1L3    | signal-induced proliferation-associated 1 like 3                                                  | 1.53 | 0.044 |
| ZNF460     | zinc finger protein 460                                                                           | 1.54 | 0.045 |
| BMS1       | BMS1 ribosome biogenesis factor                                                                   | 1.54 | 0.047 |
| MT1L       | metallothionein 1L (gene/pseudogene)                                                              | 1.54 | 0.006 |
| MMP16      | matrix metalloproteinase 16 (membrane-inserted)                                                   | 1.54 | 0.037 |
| KIF3A      | kinesin family member 3A                                                                          | 1.55 | 0.046 |
| MEG3       | maternally expressed 3 (non-protein coding)                                                       | 1.55 | 0.023 |
| DST        | dystonin                                                                                          | 1.56 | 0.048 |
| GALNT7     | UDP-N-acetyl-alpha-D-galactosamine:polypeptide<br>N-acetylgalactosaminyltransferase 7 (GalNAc-T7) | 1.57 | 0.008 |
| ITGA5      | integrin, alpha 5 (fibronectin receptor, alpha polypeptide)                                       | 1.57 | 0.048 |
| ZDHHC17    | zinc finger, DHHC-type containing 17                                                              | 1.58 | 0.044 |
| UGGT2      | UDP-glucose glycoprotein glucosyltransferase 2                                                    | 1.59 | 0.035 |
| IFNE       | interferon, epsilon                                                                               | 1.59 | 0.001 |
| SNORD113-4 | small nucleolar RNA, C/D box 113-4                                                                | 1.60 | 0.026 |
| DLC1       | deleted in liver cancer 1                                                                         | 1.60 | 0.018 |
| RAB23      | RAB23, member RAS oncogene family                                                                 | 1.60 | 0.043 |
| FBXO32     | F-box protein 32                                                                                  | 1.61 | 0.048 |
| APBB2      | amyloid beta (A4) precursor protein-binding, family B,<br>member 2                                | 1.61 | 0.049 |
| INSIG2     | insulin induced gene 2                                                                            | 1.61 | 0.033 |
| CTHRC1     | collagen triple helix repeat containing 1                                                         | 1.61 | 0.030 |
| CCDC176    | coiled-coil domain containing 176                                                                 | 1.62 | 0.029 |
| LINC00842  | long intergenic non-protein coding RNA 842                                                        | 1.62 | 0.019 |



|           |                                                                |      |       |
|-----------|----------------------------------------------------------------|------|-------|
| ACSL4     | acyl-CoA synthetase long-chain family member 4                 | 1.62 | 0.016 |
| SMYD3-IT1 | SMYD3 intronic transcript 1 (non-protein coding)               | 1.63 | 0.046 |
| ASAH2B    | N-acylsphingosine amidohydrolase (non-lysosomal ceramidase) 2B | 1.63 | 0.002 |
| EDEM3     | ER degradation enhancer, mannosidase alpha-like 3              | 1.63 | 0.046 |
| UBL3      | ubiquitin-like 3                                               | 1.64 | 0.020 |
| SNX25     | sorting nexin 25                                               | 1.65 | 0.004 |
| VDR       | vitamin D (1,25- dihydroxyvitamin D3) receptor                 | 1.65 | 0.010 |
| HIVEP2    | human immunodeficiency virus type I enhancer binding protein 2 | 1.66 | 0.002 |
| COL5A2    | collagen, type V, alpha 2                                      | 1.66 | 0.035 |
| SNORD64   | small nucleolar RNA, C/D box 64                                | 1.67 | 0.003 |
| DGKI      | diacylglycerol kinase, iota                                    | 1.68 | 0.006 |
| ABL2      | v-abl Abelson murine leukemia viral oncogene homolog 2         | 1.68 | 0.005 |
| KLHL28    | kelch-like family member 28                                    | 1.68 | 0.038 |
| BIRC2     | baculoviral IAP repeat containing 2                            | 1.69 | 0.045 |
| ARL5A     | ADP-ribosylation factor-like 5A                                | 1.69 | 0.038 |
| SMURF2    | SMAD specific E3 ubiquitin protein ligase 2                    | 1.70 | 0.022 |
| SLC39A6   | solute carrier family 39 (zinc transporter), member 6          | 1.71 | 0.044 |
| FZD8      | frizzled family receptor 8                                     | 1.71 | 0.002 |
| TMC7      | transmembrane channel-like 7                                   | 1.71 | 0.020 |
| TULP4     | tubby like protein 4                                           | 1.71 | 0.009 |
| COG6      | component of oligomeric golgi complex 6                        | 1.71 | 0.034 |
| TTC3P1    | tetratricopeptide repeat domain 3 pseudogene 1                 | 1.73 | 0.043 |
| ZBTB38    | zinc finger and BTB domain containing 38                       | 1.73 | 0.033 |

|           |                                                              |      |       |
|-----------|--------------------------------------------------------------|------|-------|
| DLG1      | discs, large homolog 1 (Drosophila)                          | 1.73 | 0.006 |
| OCIAD2    | OCIA domain containing 2                                     | 1.75 | 0.015 |
| FNDC3B    | fibronectin type III domain containing 3B                    | 1.75 | 0.043 |
| AEBP1     | AE binding protein 1                                         | 1.75 | 0.012 |
| RAI14     | retinoic acid induced 14                                     | 1.75 | 0.035 |
| CARD11    | caspase recruitment domain family, member 11                 | 1.76 | 0.035 |
| NYNRIN    | NYN domain and retroviral integrase containing               | 1.76 | 0.021 |
| RNF121    | ring finger protein 121                                      | 1.76 | 0.009 |
| USP46     | ubiquitin specific peptidase 46                              | 1.77 | 0.012 |
| PDGFB     | platelet-derived growth factor beta polypeptide              | 1.77 | 0.033 |
| EVI5      | ecotropic viral integration site 5                           | 1.78 | 0.045 |
| HOMER1    | homer homolog 1 (Drosophila)                                 | 1.78 | 0.027 |
| ELL2      | elongation factor, RNA polymerase II, 2                      | 1.78 | 0.028 |
| PANX1     | pannexin 1                                                   | 1.79 | 0.030 |
| RNF152    | ring finger protein 152                                      | 1.80 | 0.016 |
| TMEM45A   | transmembrane protein 45A                                    | 1.80 | 0.020 |
| ITGA2     | integrin, alpha 2 (CD49B, alpha 2 subunit of VLA-2 receptor) | 1.80 | 0.037 |
| KIAA1033  | KIAA1033                                                     | 1.81 | 0.031 |
| LINC00152 | long intergenic non-protein coding RNA 152                   | 1.81 | 0.034 |
| ALDH1L2   | aldehyde dehydrogenase 1 family, member L2                   | 1.81 | 0.031 |
| FNDC3A    | fibronectin type III domain containing 3A                    | 1.81 | 0.023 |
| PCDH9     | protocadherin 9                                              | 1.85 | 0.012 |
| C15orf54  | chromosome 15 open reading frame 54                          | 1.85 | 0.022 |
| HSPA13    | heat shock protein 70kDa family, member 13                   | 1.85 | 0.047 |

|             |                                                                           |      |       |
|-------------|---------------------------------------------------------------------------|------|-------|
| CEP170      | centrosomal protein 170kDa                                                | 1.85 | 0.030 |
| SAMD9       | sterile alpha motif domain containing 9                                   | 1.86 | 0.044 |
| PPP2R3A     | protein phosphatase 2, regulatory subunit B", alpha                       | 1.86 | 0.004 |
| CDK6        | cyclin-dependent kinase 6                                                 | 1.87 | 0.022 |
| LOX         | lysyl oxidase                                                             | 1.87 | 0.021 |
| GOLIM4      | golgi integral membrane protein 4                                         | 1.88 | 0.039 |
| RAB3B       | RAB3B, member RAS oncogene family                                         | 1.89 | 0.050 |
| LOXL3       | lysyl oxidase-like 3                                                      | 1.90 | 0.007 |
| MYO10       | myosin X                                                                  | 1.90 | 0.018 |
| TBX3        | T-box 3                                                                   | 1.92 | 0.031 |
| ZSWIM6      | zinc finger, SWIM-type containing 6                                       | 1.93 | 0.014 |
| BMPR2       | bone morphogenetic protein receptor, type II<br>(serine/threonine kinase) | 1.93 | 0.036 |
| SRPX2       | sushi-repeat containing protein, X-linked 2                               | 1.93 | 0.002 |
| LINC00340   | long intergenic non-protein coding RNA 340                                | 1.95 | 0.038 |
| C8orf4      | chromosome 8 open reading frame 4                                         | 1.96 | 0.025 |
| CSGALNACT2  | chondroitin sulfate N-acetylgalactosaminyltransferase 2                   | 1.97 | 0.009 |
| CDK14       | cyclin-dependent kinase 14                                                | 1.99 | 0.021 |
| NT5DC2      | 5'-nucleotidase domain containing 2                                       | 2.00 | 0.027 |
| CEP170P1    | centrosomal protein 170kDa pseudogene 1                                   | 2.00 | 0.036 |
| WNT5B       | wingless-type MMTV integration site family, member 5B                     | 2.01 | 0.029 |
| SNORA11     | small nucleolar RNA, H/ACA box 11                                         | 2.01 | 0.003 |
| COL1A1      | collagen, type I, alpha 1                                                 | 2.01 | 0.040 |
| LPCAT2      | lysophosphatidylcholine acyltransferase 2                                 | 2.02 | 0.020 |
| SNORD114-17 | small nucleolar RNA, C/D box 114-17                                       | 2.02 | 0.019 |

|            |                                                          |      |       |
|------------|----------------------------------------------------------|------|-------|
| TBC1D8B    | TBC1 domain family, member 8B (with GRAM domain)         | 2.03 | 0.040 |
| LRP1       | low density lipoprotein receptor-related protein 1       | 2.04 | 0.045 |
| FRMD6      | FERM domain containing 6                                 | 2.05 | 0.002 |
| SPSB1      | splA/ryanodine receptor domain and SOCS box containing 1 | 2.07 | 0.047 |
| PTPRK      | protein tyrosine phosphatase, receptor type, K           | 2.07 | 0.003 |
| GRPEL2     | GrpE-like 2, mitochondrial (E. coli)                     | 2.08 | 0.041 |
| KRT7       | keratin 7                                                | 2.15 | 0.004 |
| KLF7-IT1   | KLF7 intronic transcript 1 (non-protein coding)          | 2.16 | 0.048 |
| COL4A1     | collagen, type IV, alpha 1                               | 2.18 | 0.023 |
| LIMS3L     | LIM and senescent cell antigen-like domains 3-like       | 2.18 | 0.033 |
| PCDH10     | protocadherin 10                                         | 2.19 | 0.028 |
| VCAN-AS1   | VCAN antisense RNA 1                                     | 2.22 | 0.045 |
| TTC3       | tetratricopeptide repeat domain 3                        | 2.30 | 0.046 |
| MFAP5      | microfibrillar associated protein 5                      | 2.37 | 0.049 |
| MEDAG      | mesenteric estrogen-dependent adipogenesis               | 2.39 | 0.024 |
| NEGR1      | neuronal growth regulator 1                              | 2.39 | 0.040 |
| IGFBP3     | insulin-like growth factor binding protein 3             | 2.39 | 0.020 |
| MIR181A2HG | MIR181A2 host gene (non-protein coding)                  | 2.41 | 0.045 |
| SNORD114-2 | small nucleolar RNA, C/D box 114-2                       | 2.43 | 0.040 |
| LINC00312  | long intergenic non-protein coding RNA 312               | 2.46 | 0.048 |
| RNA5SP385  | RNA, 5S ribosomal pseudogene 385                         | 2.49 | 0.002 |
| PTGER2     | prostaglandin E receptor 2 (subtype EP2), 53kDa          | 2.49 | 0.033 |
| UBA6       | ubiquitin-like modifier activating enzyme 6              | 2.50 | 0.048 |
| YIPF5      | Yip1 domain family, member 5                             | 2.51 | 0.033 |
| SEMA3C     | sema domain, immunoglobulin domain (Ig), short basic     | 2.53 | 0.017 |

|          |                                                                                               |      |       |
|----------|-----------------------------------------------------------------------------------------------|------|-------|
|          | domain, secreted, (semaphorin) 3C                                                             |      |       |
| TNS1     | tensin 1                                                                                      | 2.58 | 0.005 |
| TPM1     | tropomyosin 1 (alpha)                                                                         | 2.59 | 0.025 |
| ESM1     | endothelial cell-specific molecule 1                                                          | 2.65 | 0.050 |
| WNT5A    | wingless-type MMTV integration site family, member 5A                                         | 2.66 | 0.039 |
| PLCB4    | phospholipase C, beta 4                                                                       | 2.69 | 0.050 |
| ITGBL1   | integrin, beta-like 1 (with EGF-like repeat domains)                                          | 2.73 | 0.001 |
| GRIA3    | glutamate receptor, ionotropic, AMPA 3                                                        | 2.78 | 0.022 |
| RHOB     | ras homolog family member B                                                                   | 2.79 | 0.004 |
| MBOAT2   | membrane bound O-acyltransferase domain containing 2                                          | 2.83 | 0.012 |
| PCDHGC5  | protocadherin gamma subfamily C, 5                                                            | 2.88 | 0.014 |
| TNFAIP6  | tumor necrosis factor, alpha-induced protein 6                                                | 2.90 | 0.038 |
| SPOCK1   | sparc/osteonectin, cwcv and kazal-like domains proteoglycan (testican) 1                      | 2.91 | 0.018 |
| ADAMTS6  | ADAM metallopeptidase with thrombospondin type 1 motif, 6                                     | 2.92 | 0.042 |
| VEGFA    | vascular endothelial growth factor A                                                          | 2.97 | 0.018 |
| ITGAV    | integrin, alpha V                                                                             | 2.97 | 0.023 |
| SLC19A2  | solute carrier family 19 (thiamine transporter), member 2                                     | 3.03 | 0.009 |
| WISP1    | WNT1 inducible signaling pathway protein 1                                                    | 3.07 | 0.034 |
| PGM2L1   | phosphoglucomutase 2-like 1                                                                   | 3.08 | 0.033 |
| LIPG     | lipase, endothelial                                                                           | 3.11 | 0.031 |
| SERPINE2 | serpin peptidase inhibitor, clade E (nexin, plasminogen activator inhibitor type 1), member 2 | 3.12 | 0.008 |
| PLXDC2   | plexin domain containing 2                                                                    | 3.13 | 0.040 |

|          |                                                                    |      |       |
|----------|--------------------------------------------------------------------|------|-------|
| LMCD1    | LIM and cysteine-rich domains 1                                    | 3.23 | 0.026 |
| PALLD    | palladin, cytoskeletal associated protein                          | 3.34 | 0.013 |
| PPP1R14C | protein phosphatase 1, regulatory (inhibitor) subunit 14C          | 3.43 | 0.029 |
| PDPN     | podoplanin                                                         | 3.44 | 0.044 |
| DACT1    | dishevelled-binding antagonist of beta-catenin 1                   | 3.48 | 0.019 |
| DPYSL3   | dihydropyrimidinase-like 3                                         | 3.50 | 0.050 |
| PDGFC    | platelet derived growth factor C                                   | 3.70 | 0.024 |
| FBLN5    | fibulin 5                                                          | 3.79 | 0.003 |
| ANGPTL4  | angiopoietin-like 4                                                | 3.81 | 0.034 |
| BHLHE40  | basic helix-loop-helix family, member e40                          | 3.82 | 0.021 |
| NOX4     | NADPH oxidase 4                                                    | 3.86 | 0.004 |
| CDH2     | cadherin 2, type 1, N-cadherin (neuronal)                          | 3.89 | 0.003 |
| C5orf46  | chromosome 5 open reading frame 46                                 | 3.95 | 0.031 |
| LTBP2    | latent transforming growth factor beta binding protein 2           | 4.09 | 0.005 |
| SEMA7A   | semaphorin 7A, GPI membrane anchor (John Milton Hagen blood group) | 4.13 | 0.018 |
| STK38L   | serine/threonine kinase 38 like                                    | 4.17 | 0.017 |
| FAP      | fibroblast activation protein, alpha                               | 4.27 | 0.009 |
| PMEPA1   | prostate transmembrane protein, androgen induced 1                 | 4.34 | 0.043 |
| CDKN2B   | cyclin-dependent kinase inhibitor 2B (p15, inhibits CDK4)          | 4.99 | 0.035 |
| SLC46A3  | solute carrier family 46, member 3                                 | 4.99 | 0.020 |
| XYLT1    | xylosyltransferase I                                               | 5.23 | 0.023 |
| TSPAN13  | tetraspanin 13                                                     | 5.77 | 0.022 |
| ADAM12   | ADAM metallopeptidase domain 12                                    | 6.43 | 0.009 |
| SKIL     | SKI-like oncogene                                                  | 6.56 | 0.013 |

|       |                                                 |      |       |
|-------|-------------------------------------------------|------|-------|
| CDH6  | cadherin 6, type 2, K-cadherin (fetal kidney)   | 6.77 | 0.003 |
| TGFBI | transforming growth factor, beta-induced, 68kDa | 7.05 | 0.002 |

466

467 **Supplemental table 2. Sequencing summary of the small RNA libraries.**

468 Raw reads were quality processed and aligned to the reference mouse genome mm10 and  
 469 miRBase (miRBase22) (TGF- $\beta$  transgenic mouse=TGF). Total number and the percentage of  
 470 processed reads mapped to miRNA is shown. The number of miRNAs identified in each  
 471 sample with  $\geq 1$  or  $\geq 3$  read counts are indicated

472

| Sample                                     | TGF 1       | TGF 2      | TGF 3       | TGF 4       | WT 1       | WT 2       | WT 3       | WT 4      |
|--------------------------------------------|-------------|------------|-------------|-------------|------------|------------|------------|-----------|
| Total Raw Reads                            | 8901145     | 26028620   | 27046765    | 16157349    | 13532478   | 16001879   | 27101615   | 20852973  |
| Avg. read length                           | 20.8328     | 21.2732    | 21.1261     | 19.7869     | 19.5943    | 19.7583    | 21.2419    | 21.0306   |
| Reads after pre-processing                 | 8572099     | 24888731   | 25517586    | 15315321    | 12806417   | 15185028   | 26228520   | 19853251  |
| Aligned (%)                                | 96.30       | 95.62      | 94.35       | 94.79       | 94.63      | 94.90      | 96.78      | 95.21     |
| Fully within a microRNA                    | 16.84%      | 35.16%     | 27.01%      | 16.16%      | 16.29%     | 18.47%     | 37.36%     | 30.94%    |
| Partly within a microRNA                   | 5.72%       | 11.38%     | 9.22%       | 5.56%       | 5.33%      | 6.11%      | 13.19%     | 10.94%    |
| Not in a microRNA                          | 77.45%      | 53.46%     | 63.78%      | 78.28%      | 78.39%     | 75.42%     | 49.45%     | 58.12%    |
| microRNA reads                             | 1443541.472 | 8750877.82 | 6892299.979 | 2474955.874 | 2086165.33 | 2804674.67 | 9798975.07 | 6142595.9 |
| Total expressed miRNA<br>(1 or more reads) | 423         | 429        | 442         | 434         | 411        | 428        | 412        | 412       |
| miRNA (3 or more reads)                    | 362         | 347        | 358         | 356         | 351        | 346        | 327        | 331       |

473

474



# Uncuted blotting

## MiR-181b targets semaphorin 3a to mediate TGF- $\beta$ -induced endothelial-to-mesenchymal transition related to atrial fibrillation

**Running title:** *MiR-181b is associated with TGF- $\beta$ -induced EndMT in AF*

Ying-Ju Lai<sup>1,2,3#</sup>, Feng-Chun Tsai<sup>4,5#</sup>, Gwo-Jyh Chang<sup>1,6</sup>, Shang-Hung Chang,<sup>1,5</sup> Chung-Chi Huang,<sup>2,7</sup> Wei-Jan Chen,<sup>1,5\*</sup> Yung-Hsin Yeh<sup>1,5\*</sup>

<sup>1</sup>Cardiovascular Department, Chang Gung Memorial Hospital, Tao-Yuan, <sup>2</sup>Department of Respiratory Therapy, Chang Gung University College of Medicine, Tao-Yuan. <sup>3</sup>Department of Respiratory Care, Chang Gung University of Science and Technology, Chia-Yi. <sup>4</sup>Department of Thoracic and Cardiovascular Surgery, Chang Gung Memorial Hospital, Tao-Yuan. <sup>5</sup>Department of medicine, Chang Gung University College of Medicine, <sup>6</sup>Graduate Institute of Clinical Medical Sciences, Chang Gung University College of Medicine, <sup>7</sup> Department of Pulmonary and Critical Care Medicine, Chang Gung Memorial Hospital, Tao-Yuan, Taiwan

The authors have declared that no conflict of interest exists.

Address for Correspondence: Yung-Hsin Yeh, MD

The Cardiovascular Department, Chang Gung Memorial Hospital, Fu -Shin Rd. No. 5, Kwei - Shan, Tao-Yuan 333, Taiwan

Tel: 886-3-3281200 ext 8162

Fax: 886-3-3271192

E-mail: [yeongshinn@cgmh.org.tw](mailto:yeongshinn@cgmh.org.tw)

Wei-Jan Chen, MD, PhD

The Cardiovascular Department, Chang Gung Memorial Hospital, Fu -Shin Rd. No. 5, Kwei - Shan, Tao-Yuan 333, Taiwan

Tel: 886-3-3281200 ext 8162

Fax: 886-3-3271192

E-mail: [wjchen@cgmh.org.tw](mailto:wjchen@cgmh.org.tw)

Figure 2B

CD31

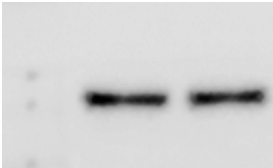

eNOS

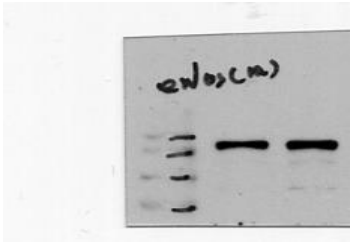

SMA

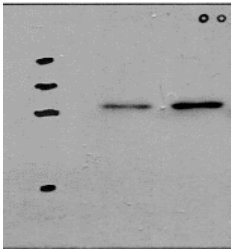

GAPDH

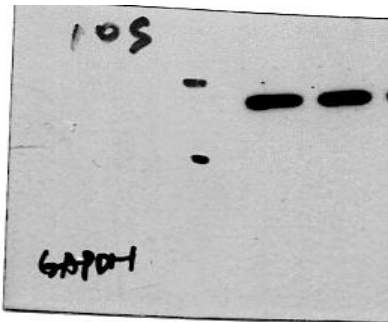

**Figure 2F**

Scrambled **Mimic-181b**

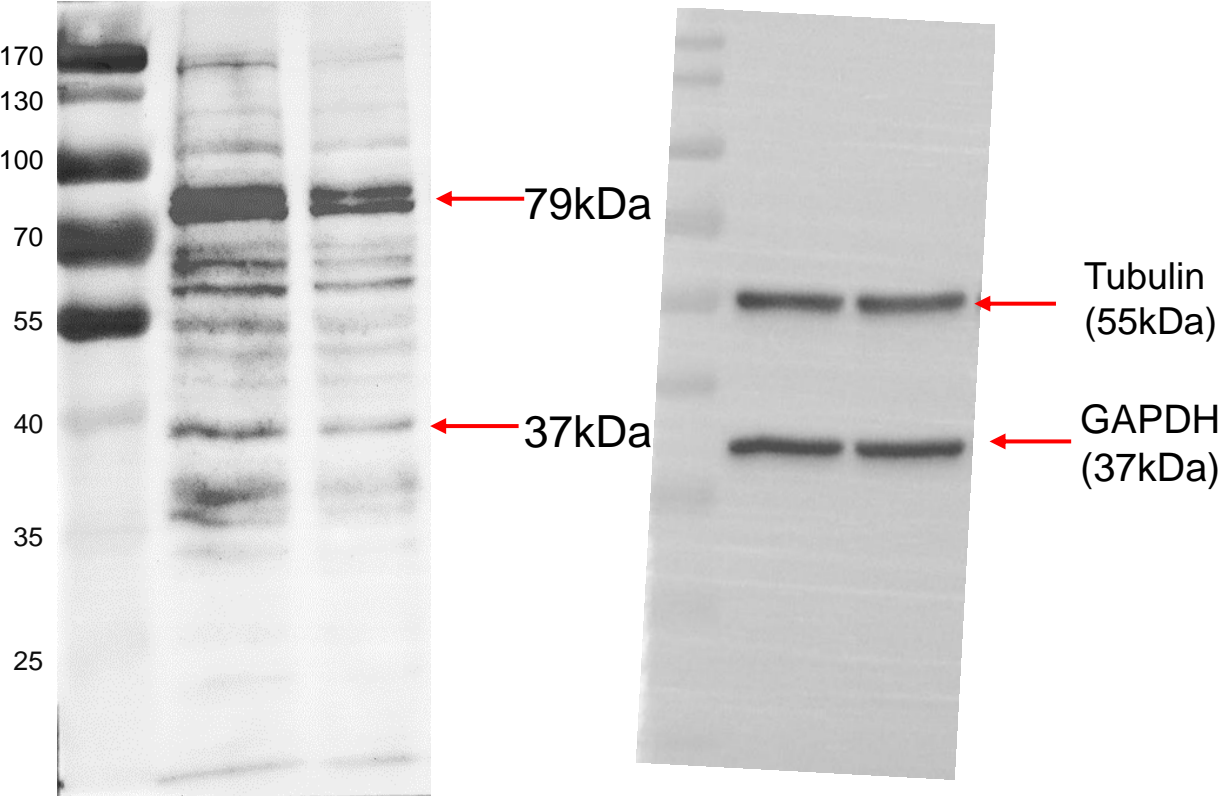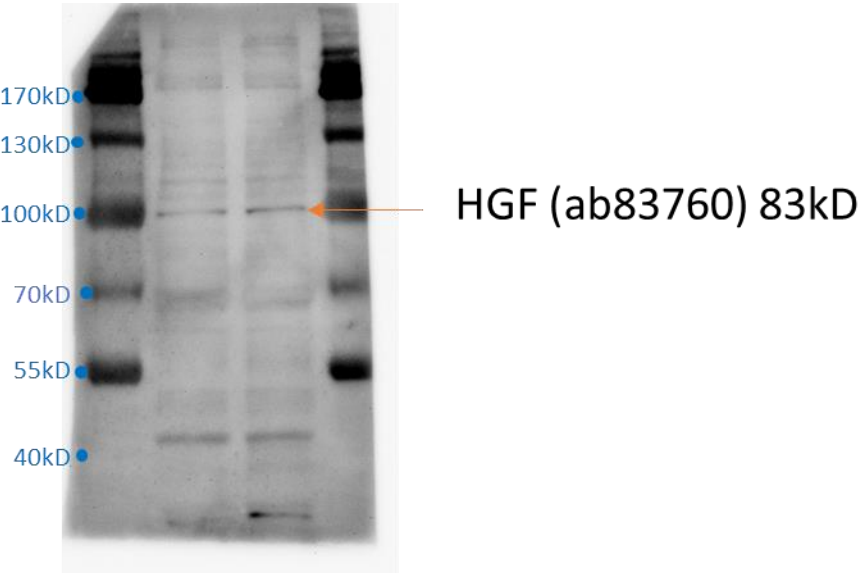

Figure 4A

**Twist (26kD)**

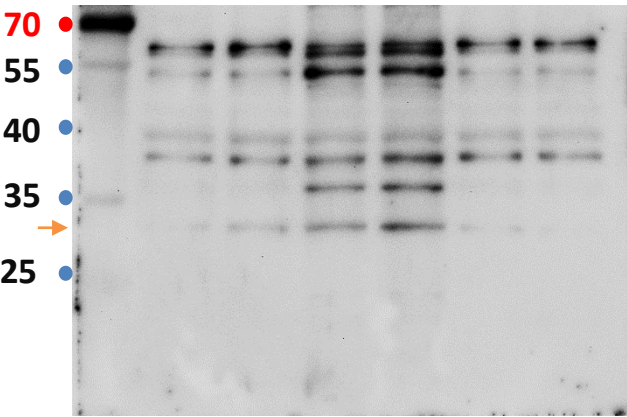

**GAPDH(37kD)**

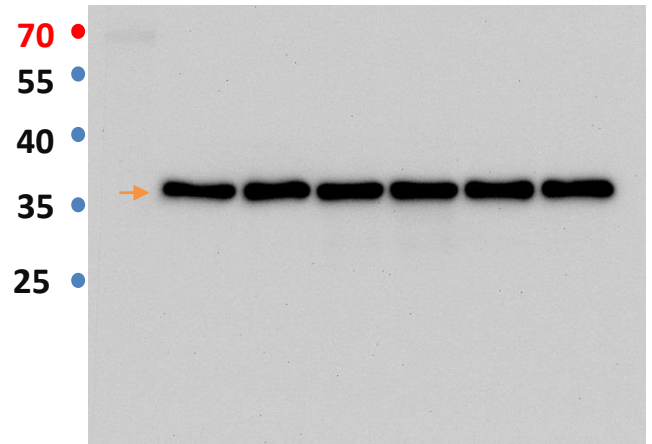

**Sema3A**

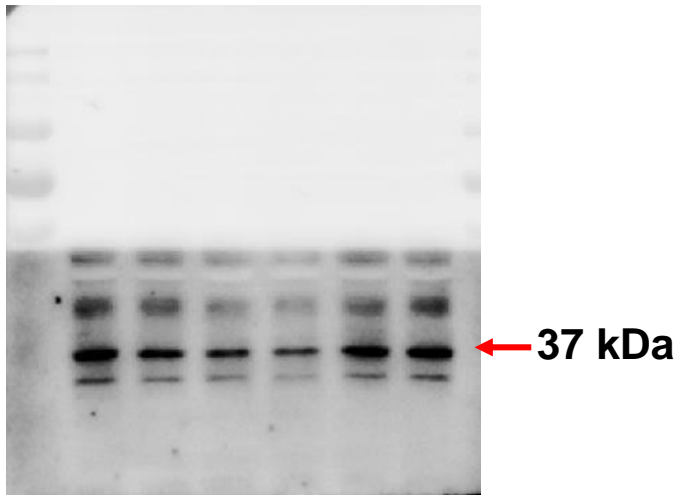

**SMA (42kD)**

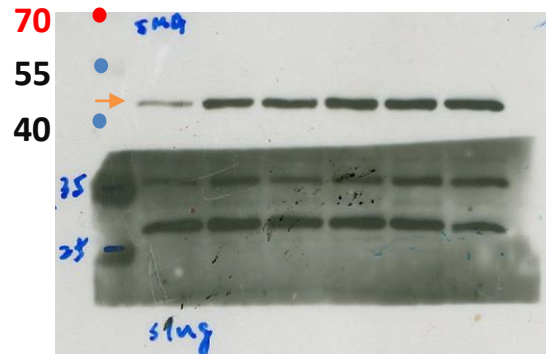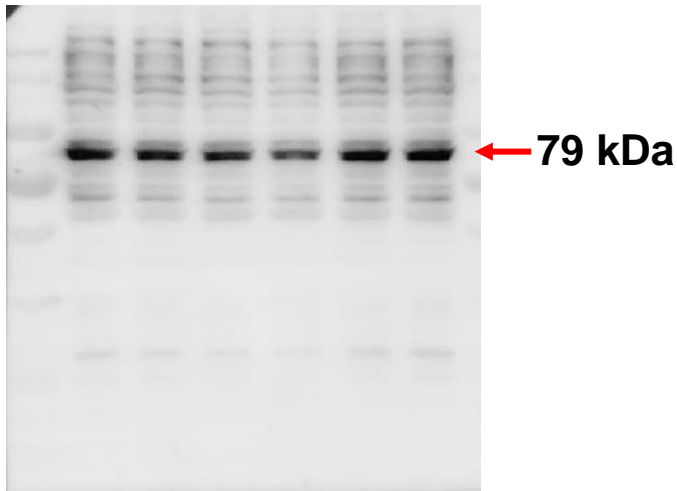

**Figure 4A**

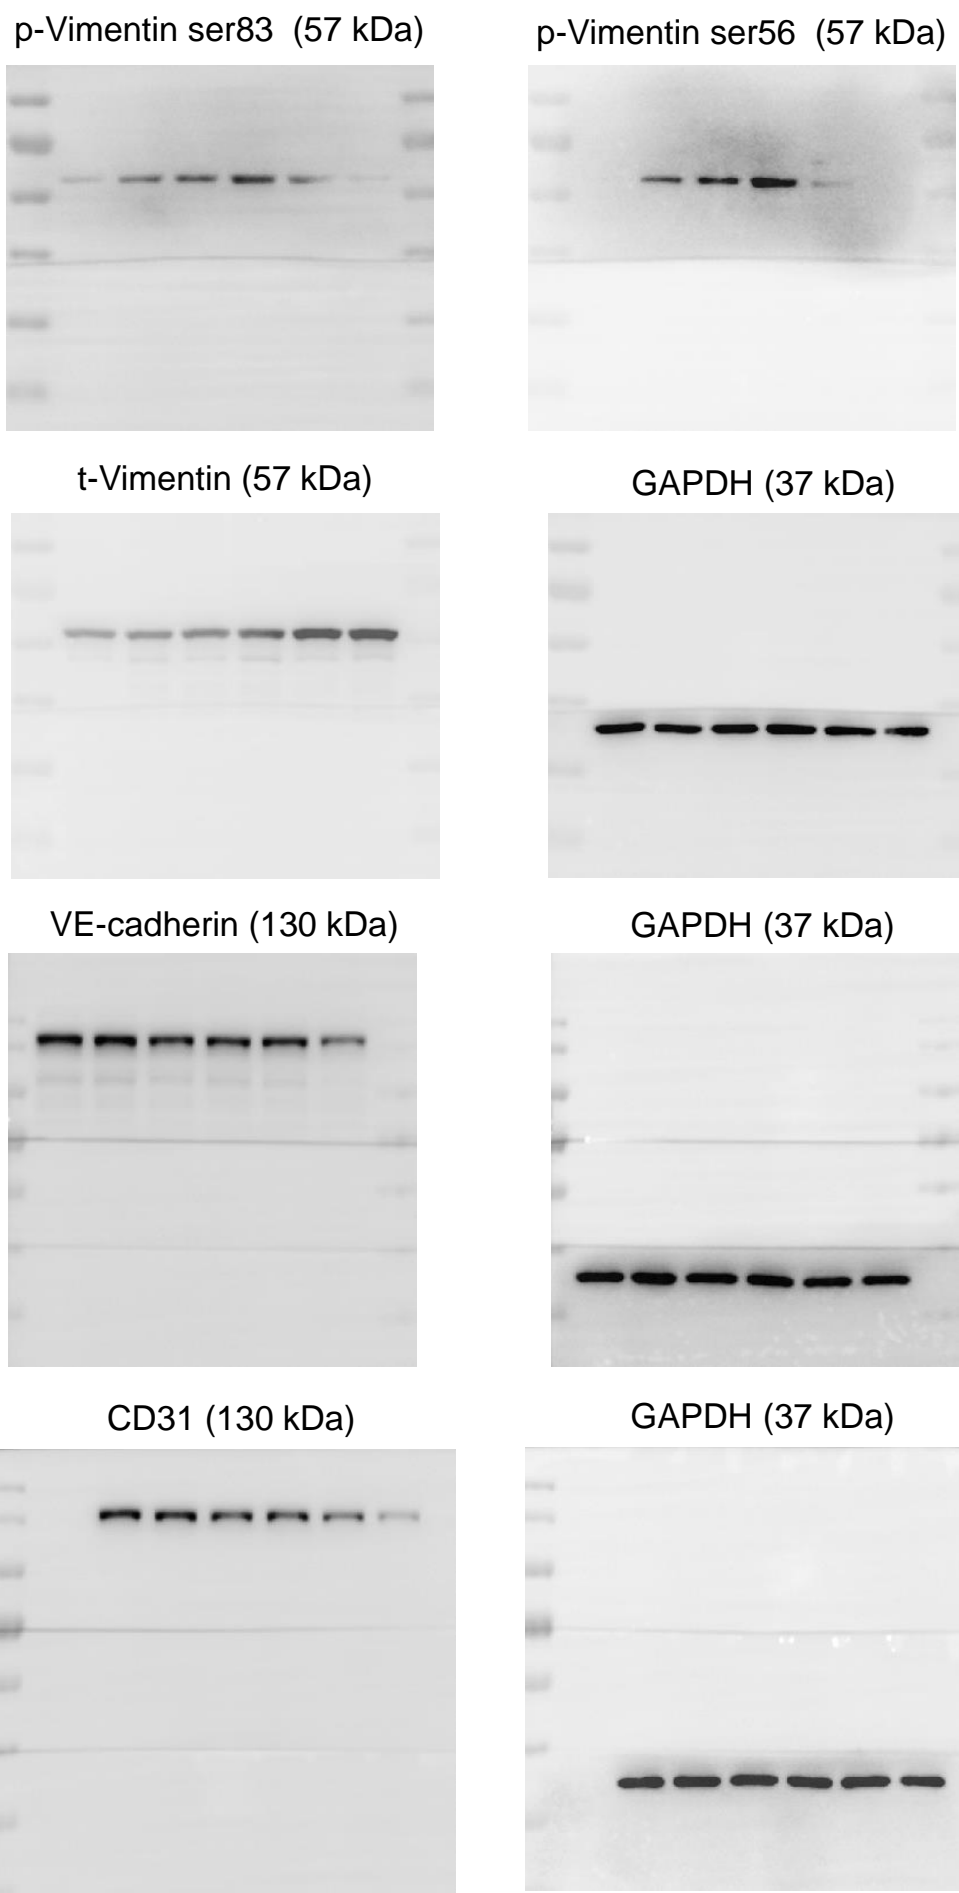

**Figure 4A**

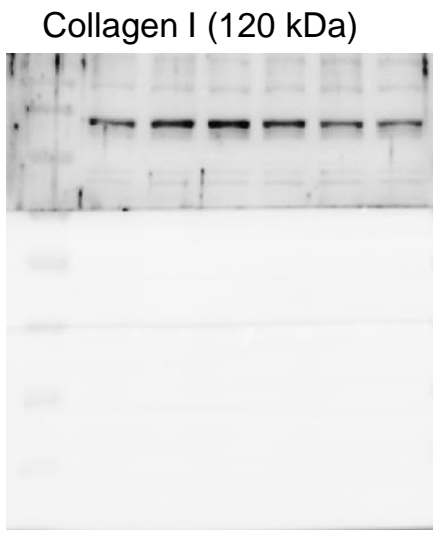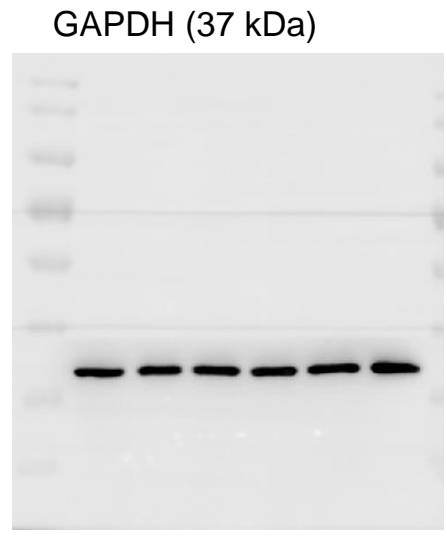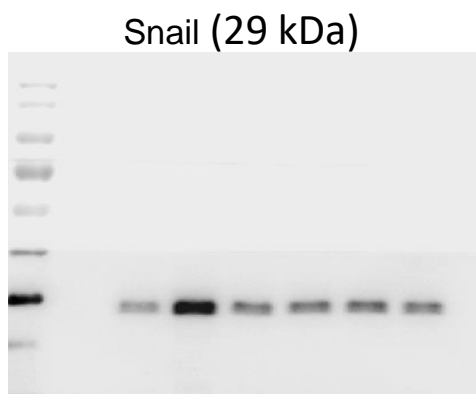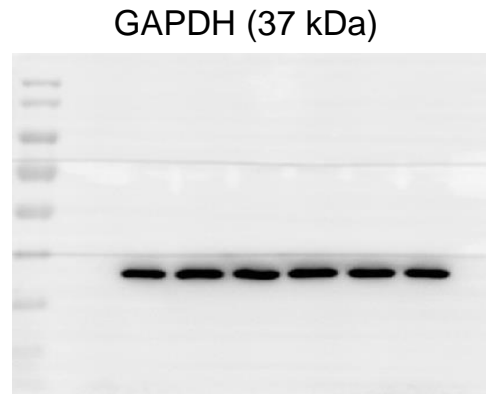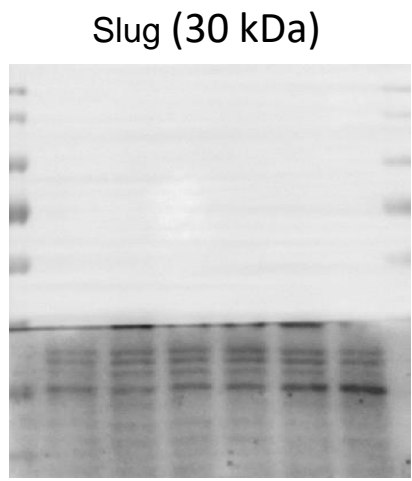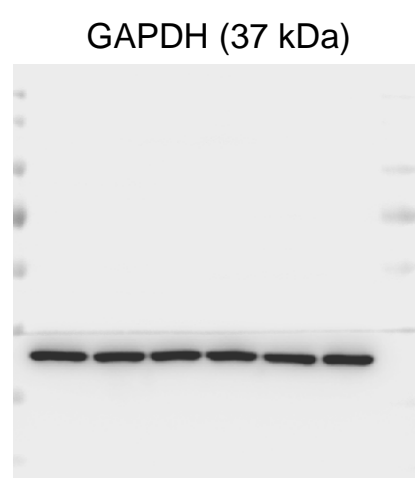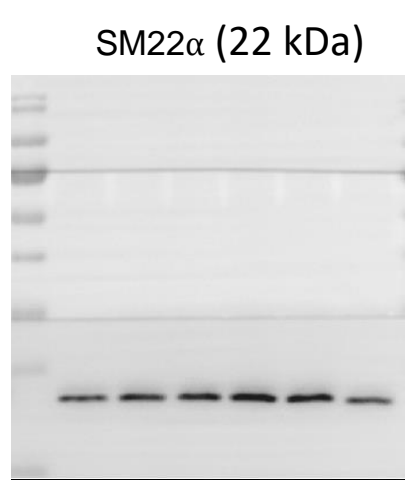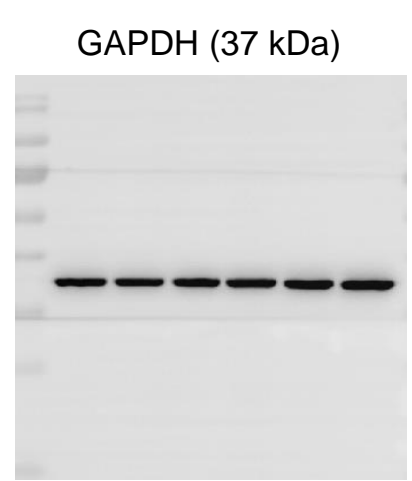

**Figure 4B**

**Sema3a**

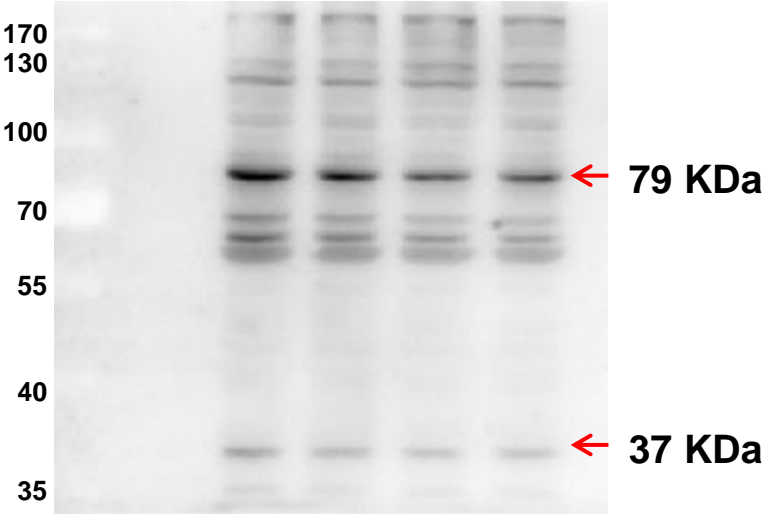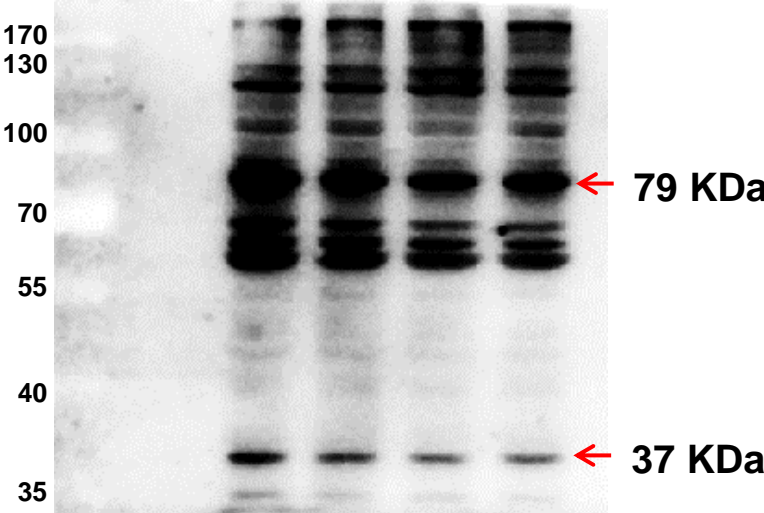

**GAPDH**

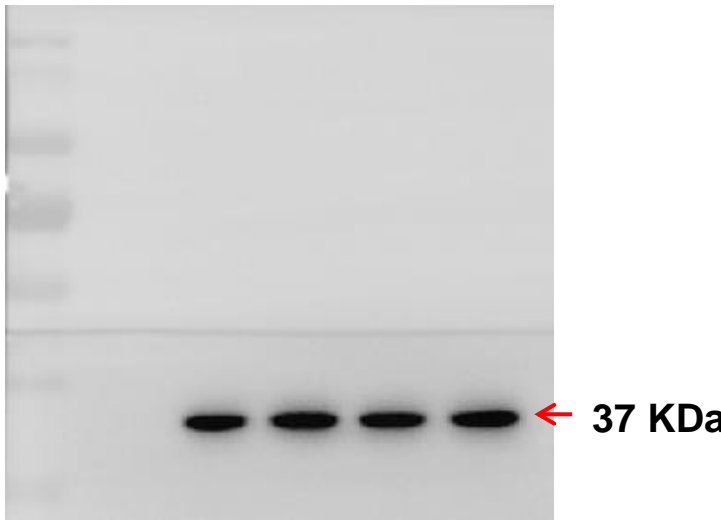

**Figure 4B**

**SMA**

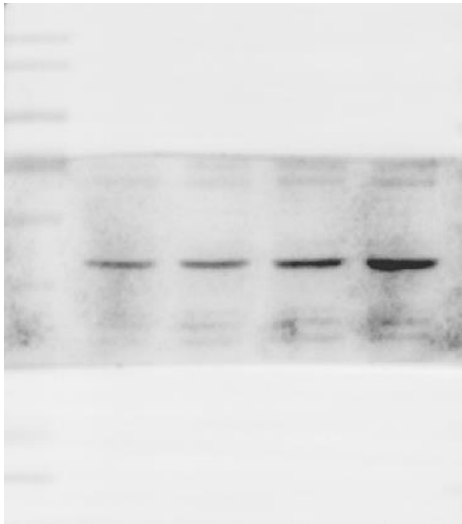

**Twist**

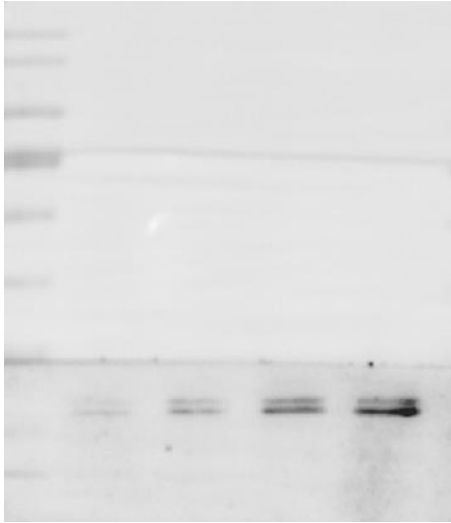

**GAPDH**

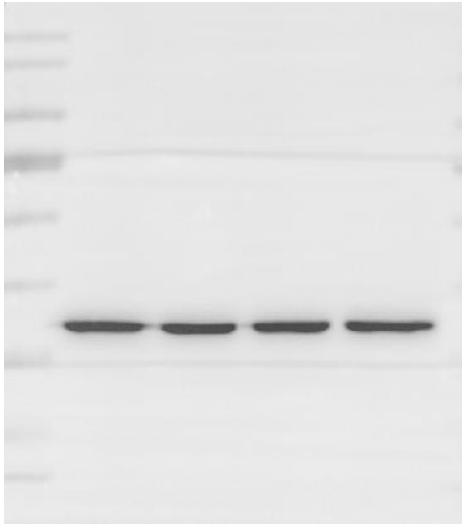



**Figure 4C**

PageRuler™ Prestained Protein Ladder, 10 to 180 kDa

Catalog number: 26616

|                |   |   |   |   |
|----------------|---|---|---|---|
| TGF-β          | - | + | - | + |
| Scramble       | + | + | - | - |
| antagomir-181b | - | - | + | + |

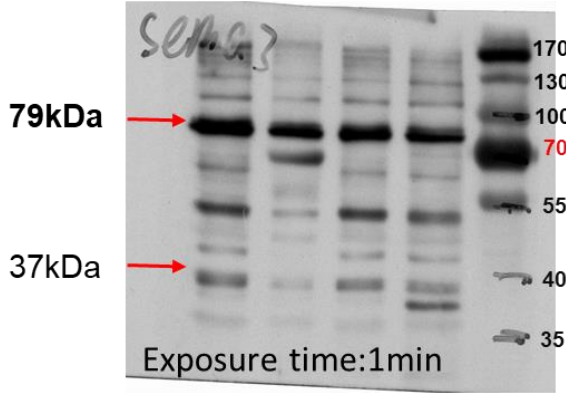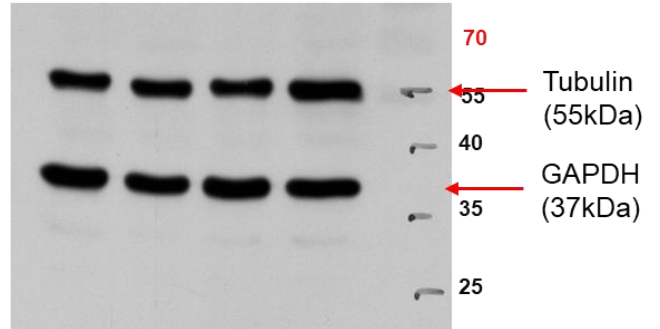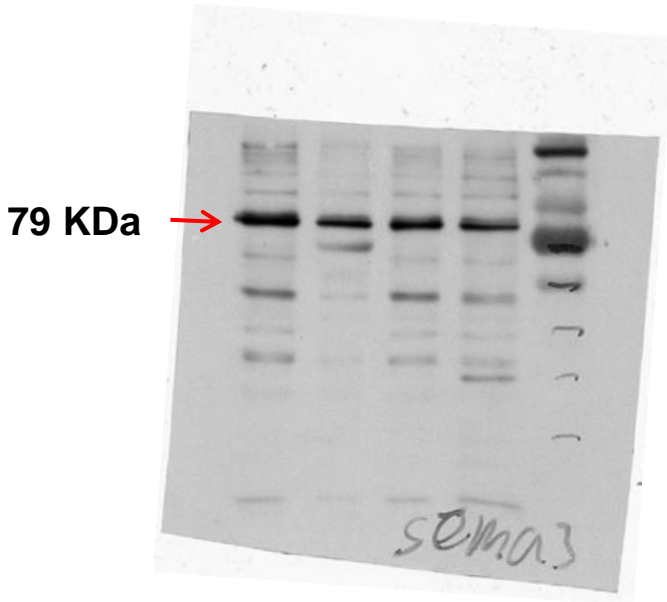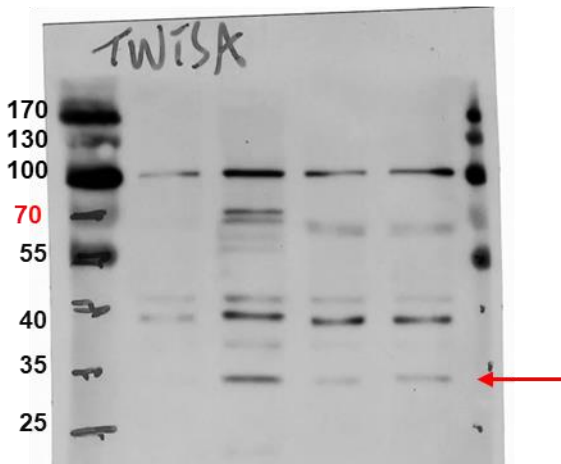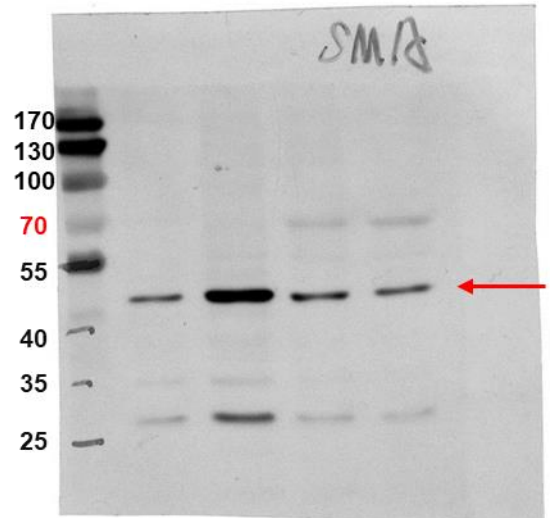

**Figure 4G**

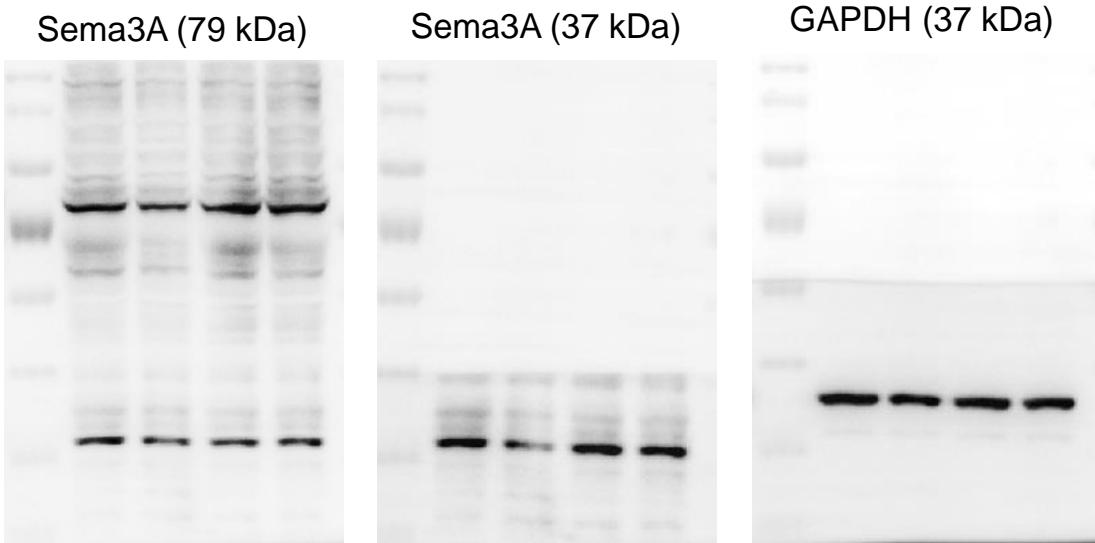

**Figure 4H**

Scrambled siRNA    Sema3a siRNA

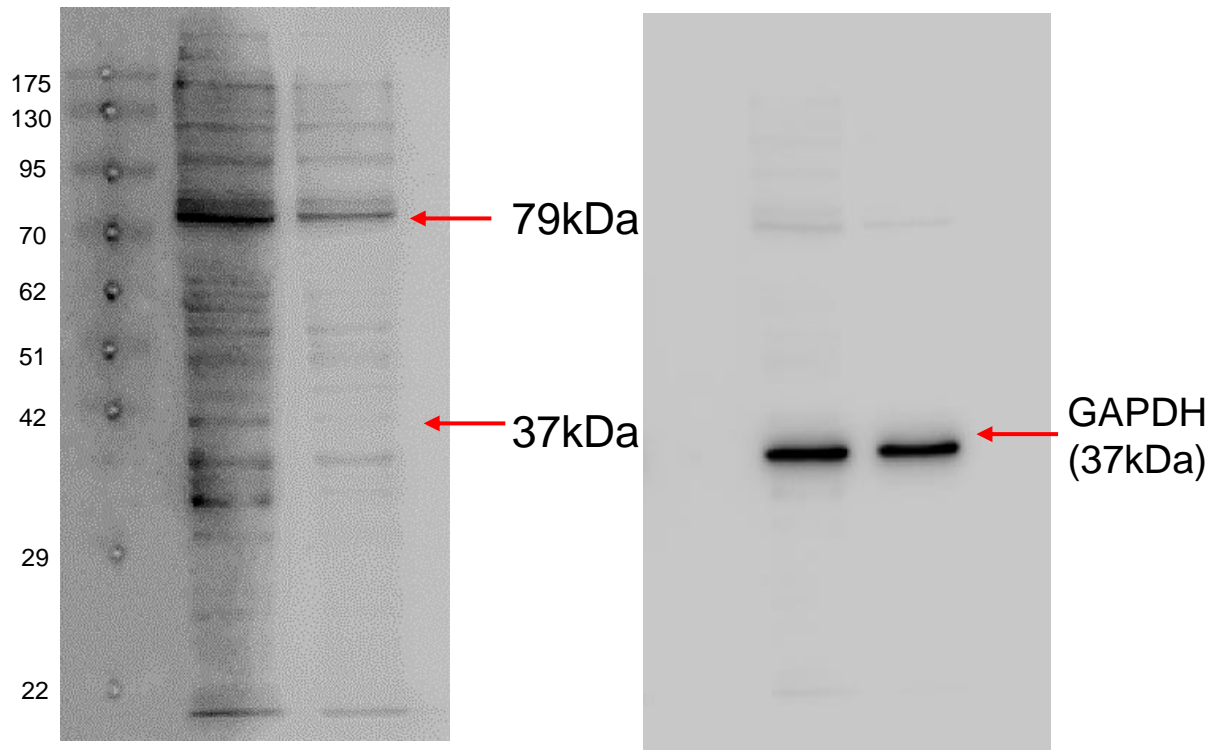

Primary Ab: SEMA3A (37 , 79kDa) 1:1000  
Secondary Ab: anti-mouse 1:5000

$\alpha$ -SMA(43kDa)

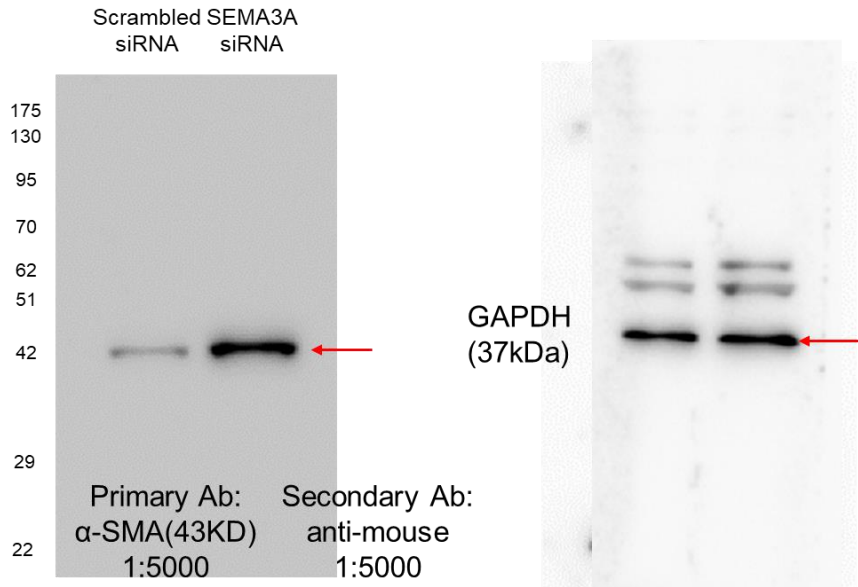

Primary Ab:  $\alpha$ -SMA(43KD) 1:5000  
Secondary Ab: anti-mouse 1:5000

**Figure 4H**

Cofilin(19kD)

Scrambled SEMA3A  
siRNA siRNA

pCofilin(19kDa)

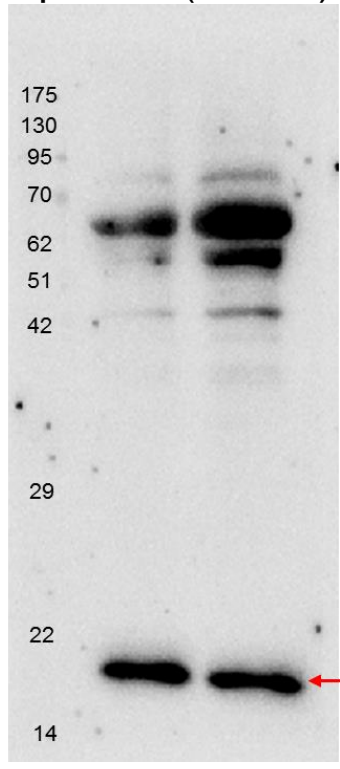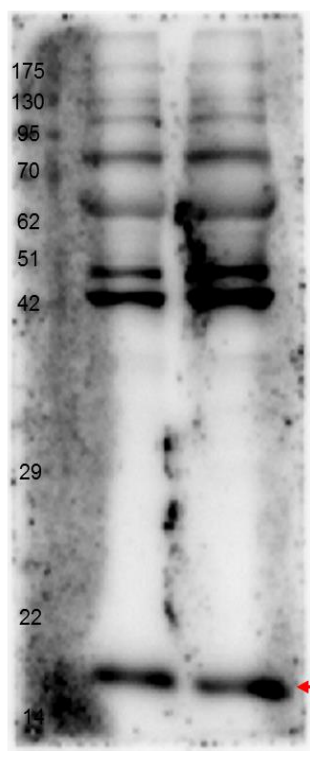

GAPDH  
(37kDa)

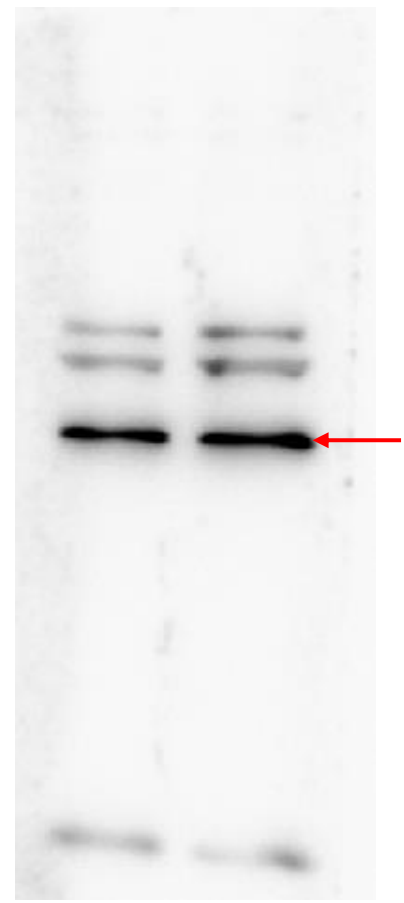

LIMK2(70kDa)

Scrambled SEMA3A  
siRNA siRNA

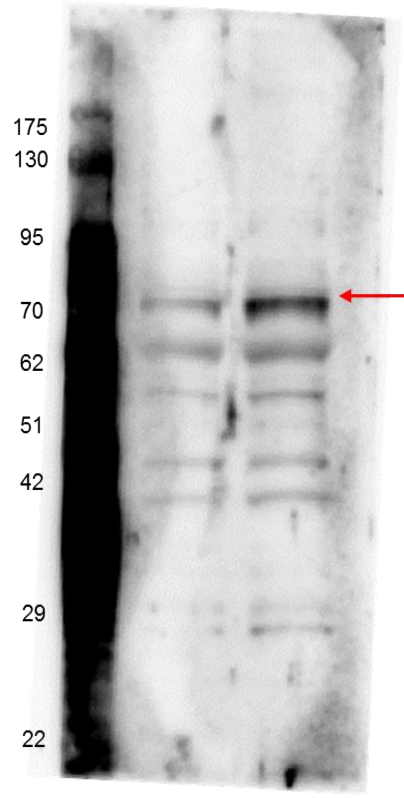

twist (26kDa)

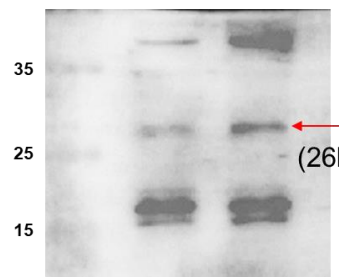

GAPDH

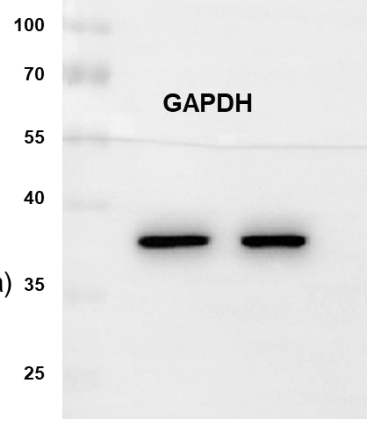

Figure 5A

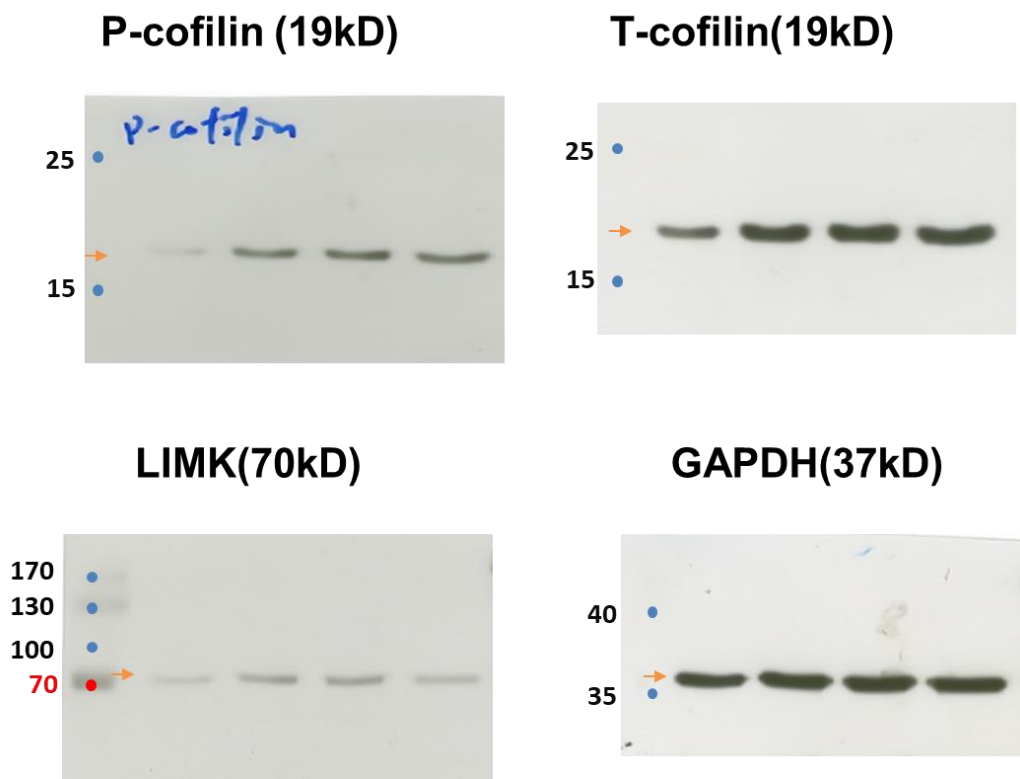

**Figure 5B**

**LIMK**

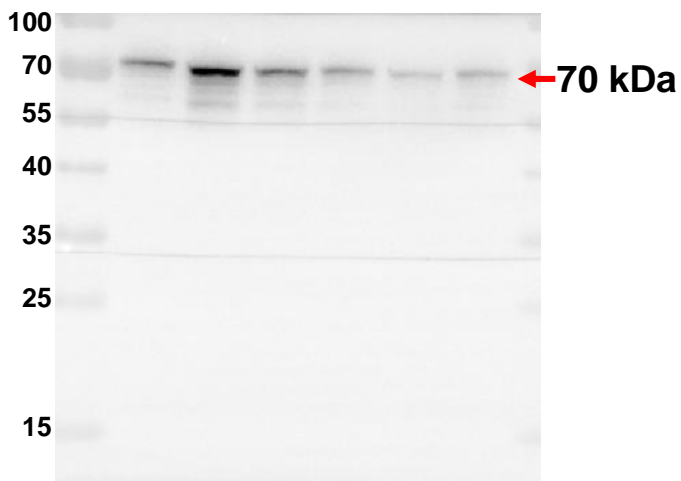

**GAPDH**

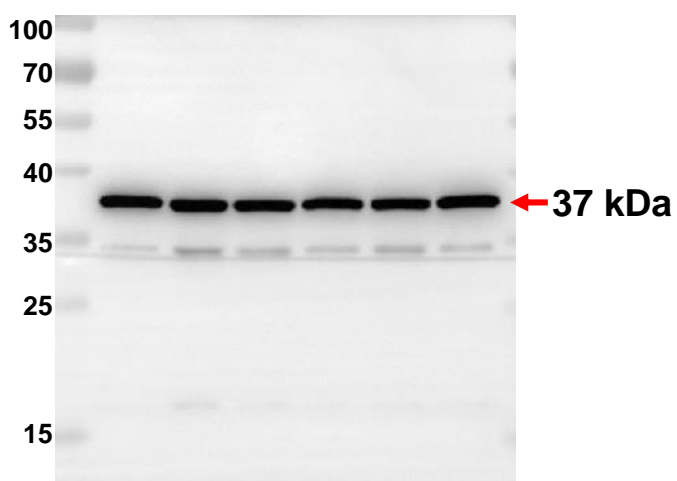

**p-Cofilin**

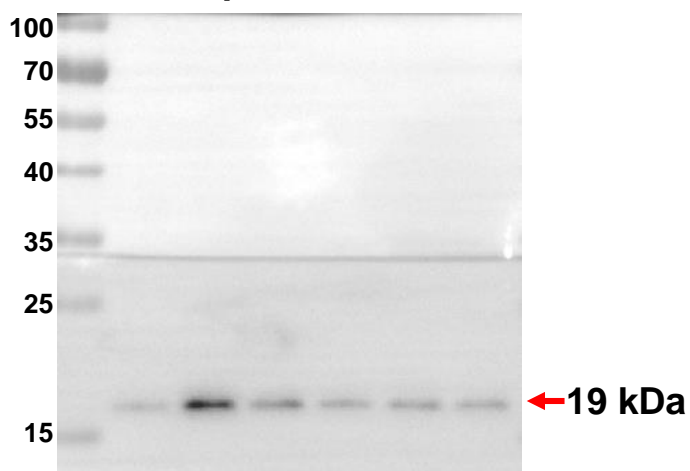

**p-Cofilin**

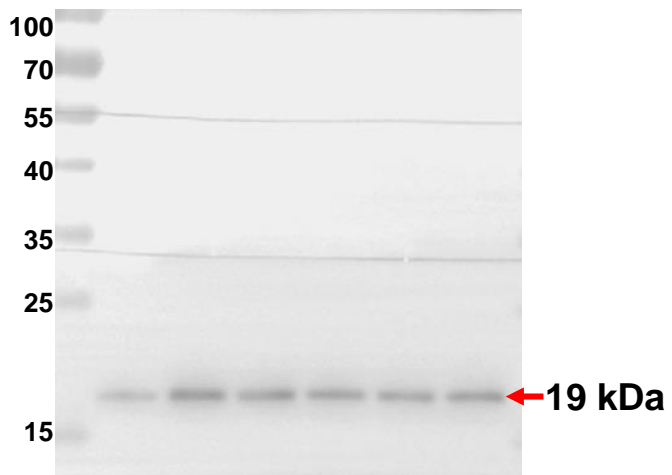

**Figure 5B**

**SMA**

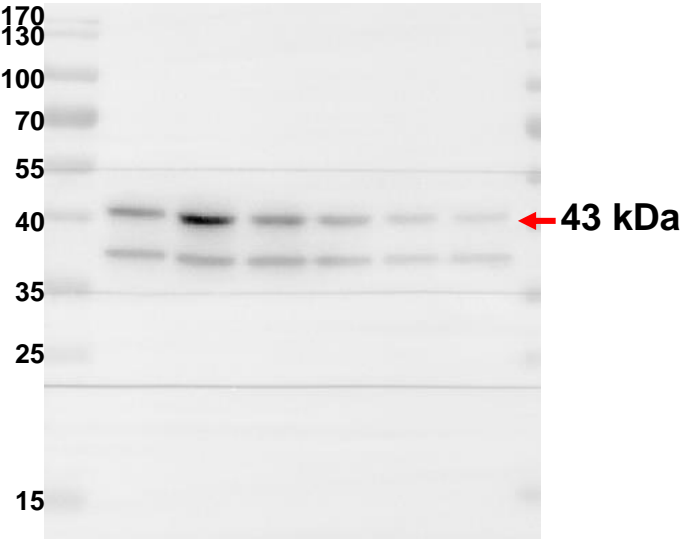

**GAPDH**

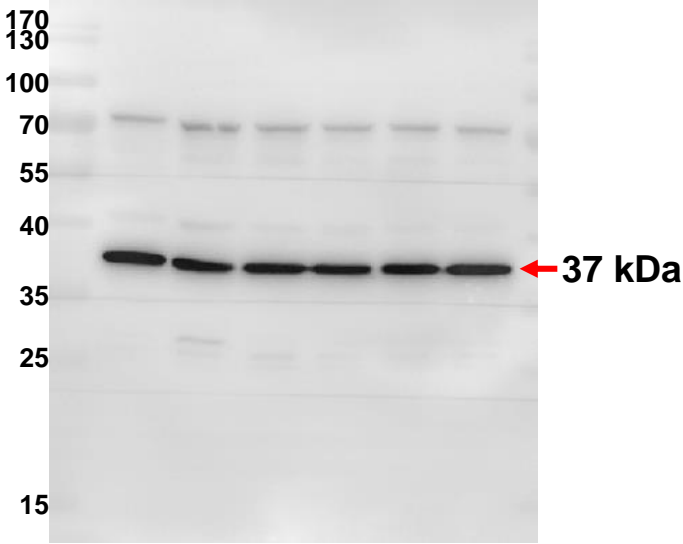

**Twist**

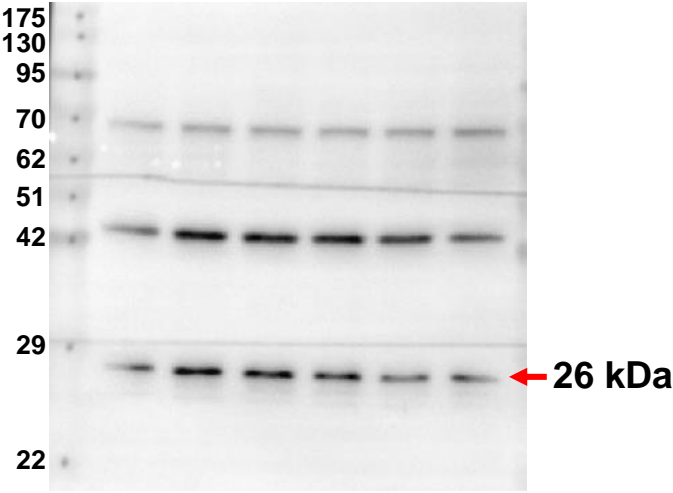

**GAPDH**

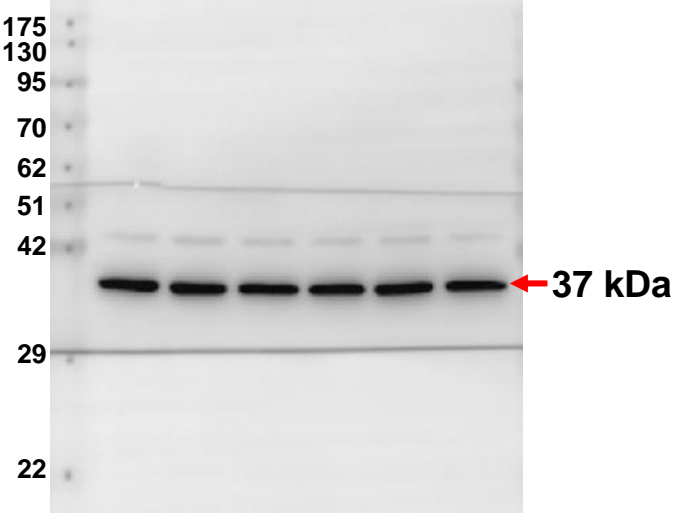

**Figure 5B**

**CD31**

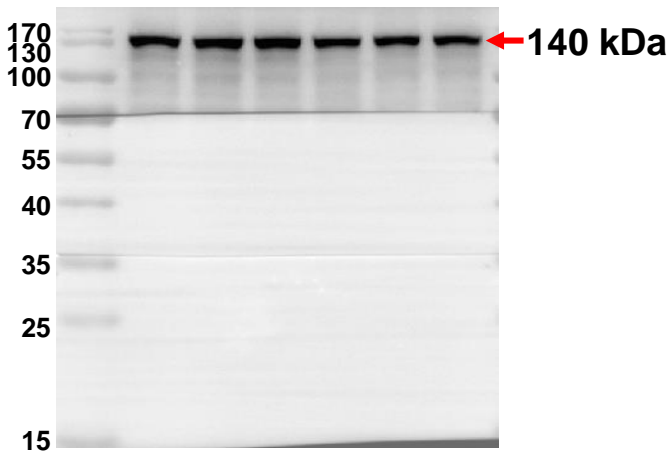

**VE-cadherin**

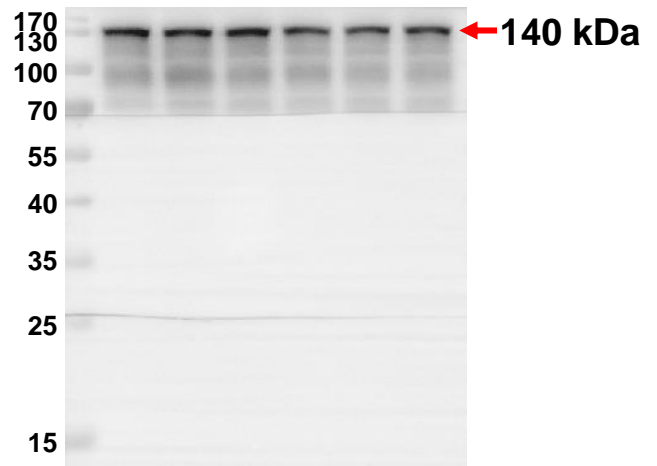

**Snail**

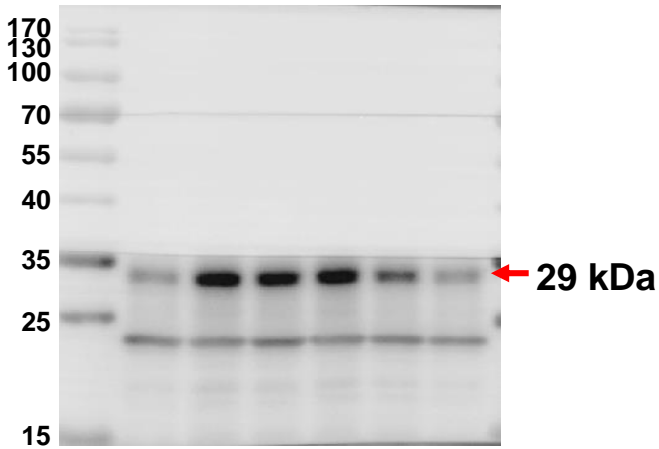

**Slug**

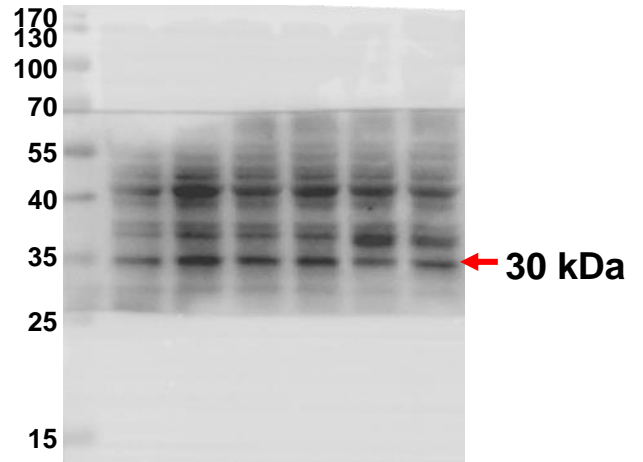

**GAPDH**

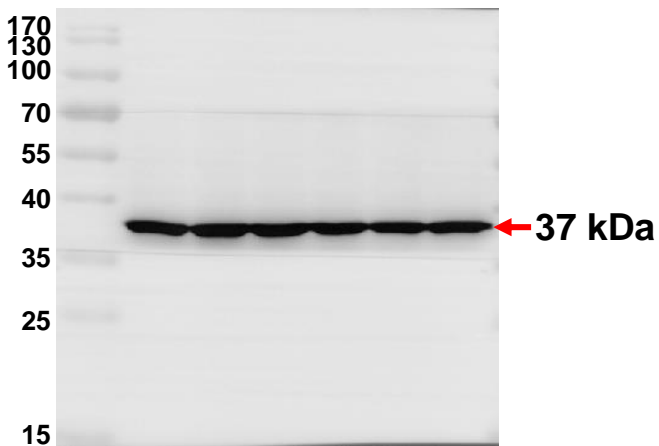

**GAPDH**

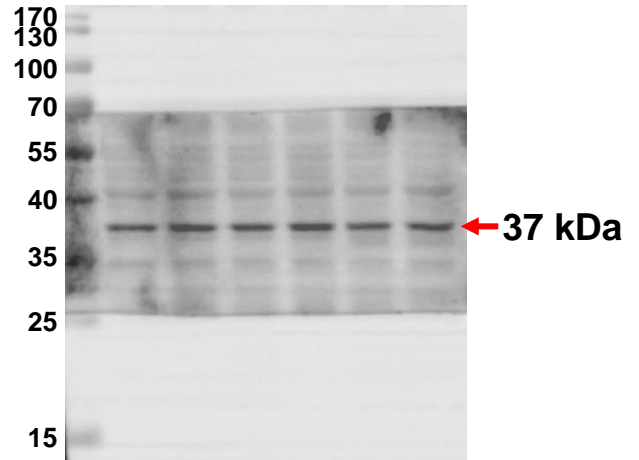



**Figure 5B**

**SM22 $\alpha$**

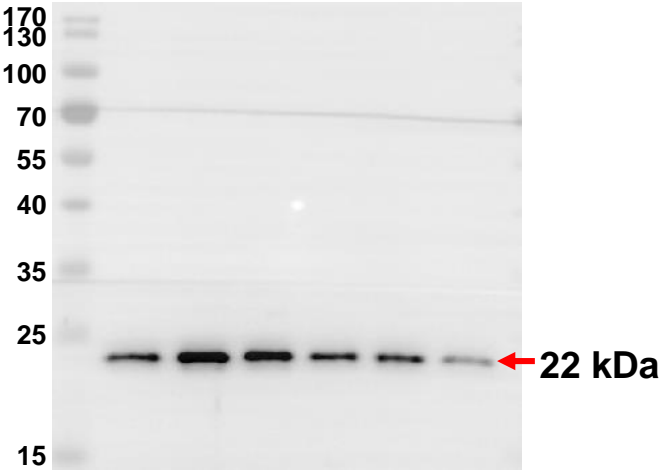

**Vimentin**

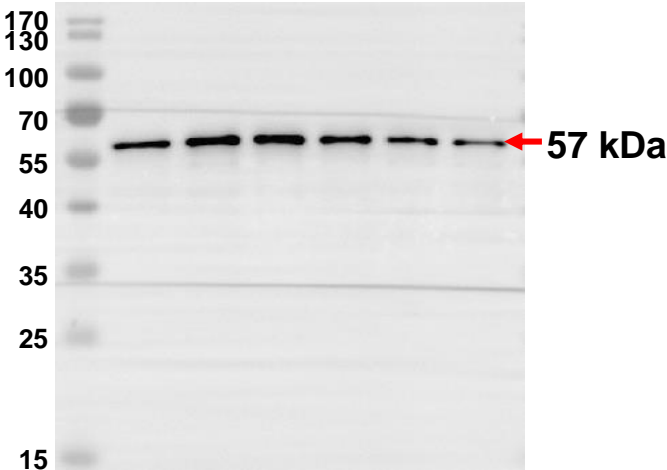

**GAPDH**

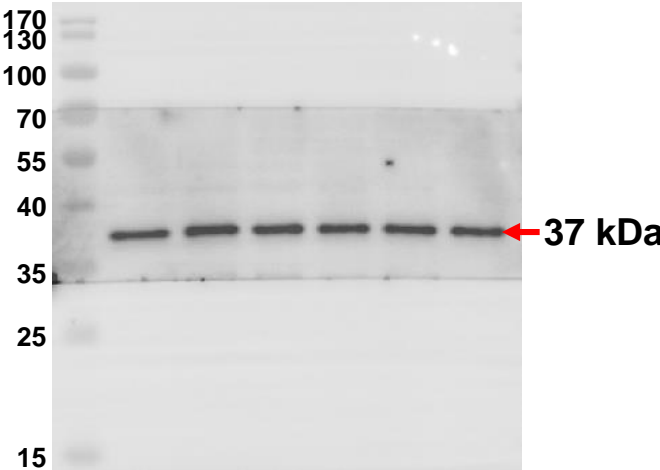

Figure 6E

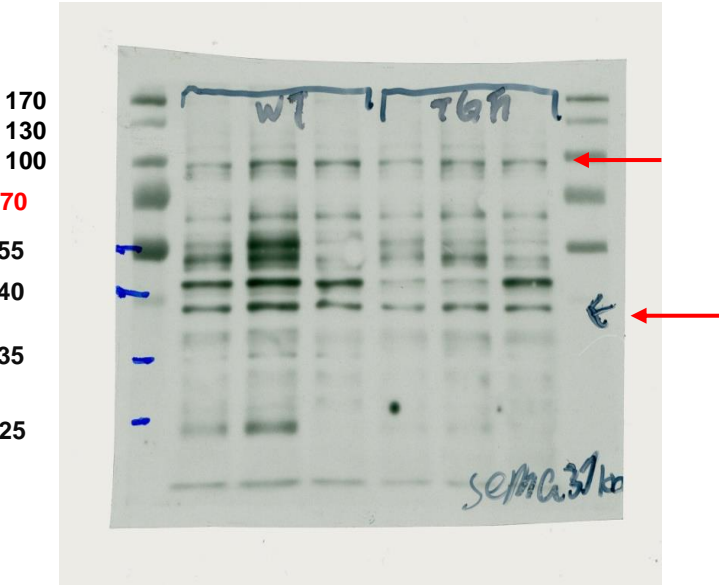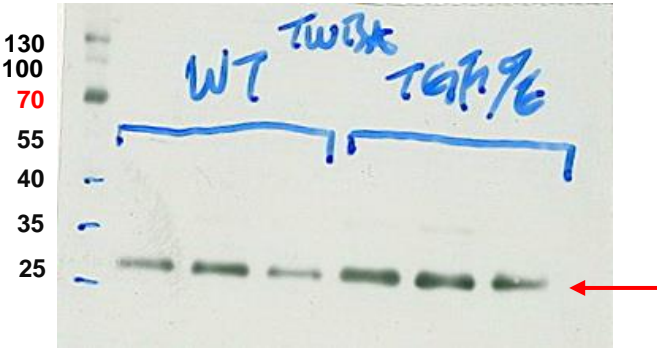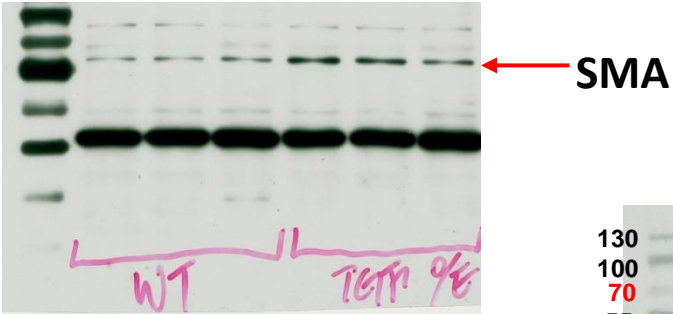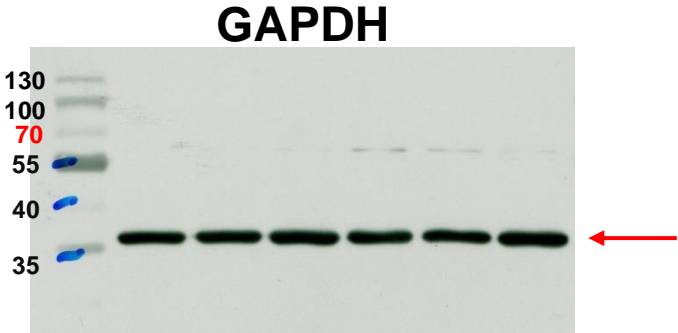

**Figure 7H.**

Sema3A (79 kDa)

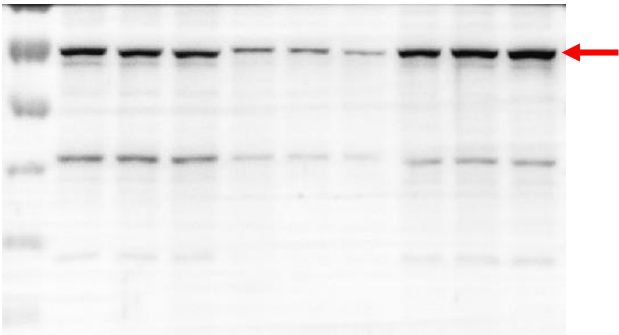

Sema3A (37 kDa)

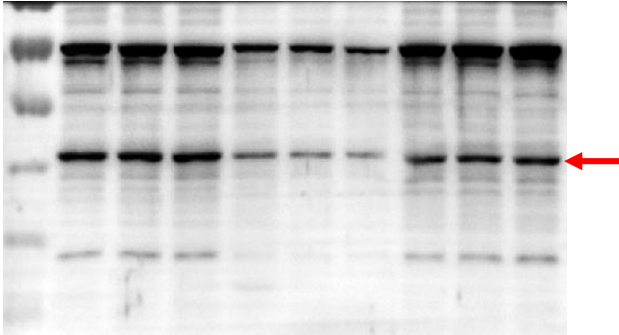

VE-cadherin (130 kDa)

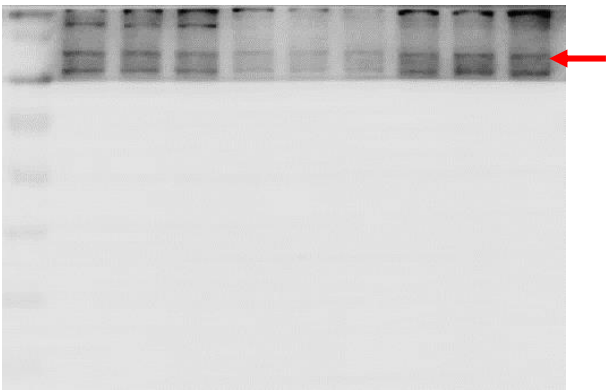

CD31 (130 kDa)

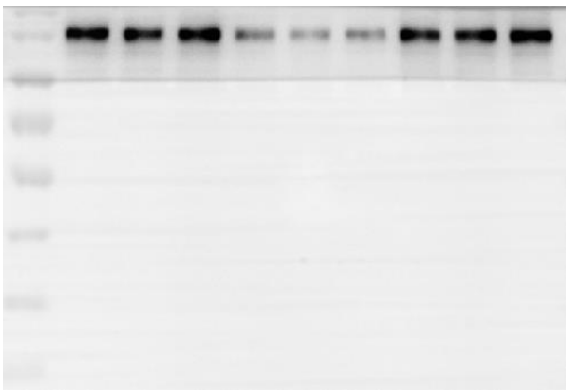

GAPDH (37 kDa)

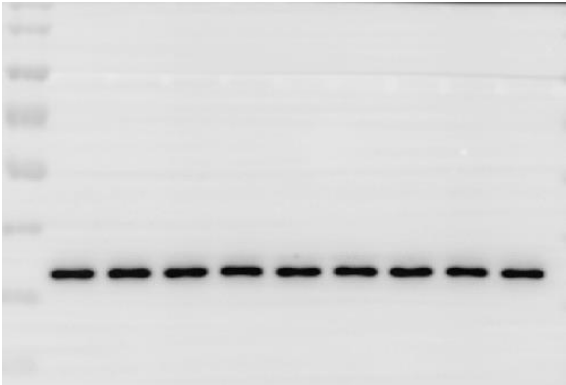

**Figure 7H.**

t-Vimentin (57 kDa)

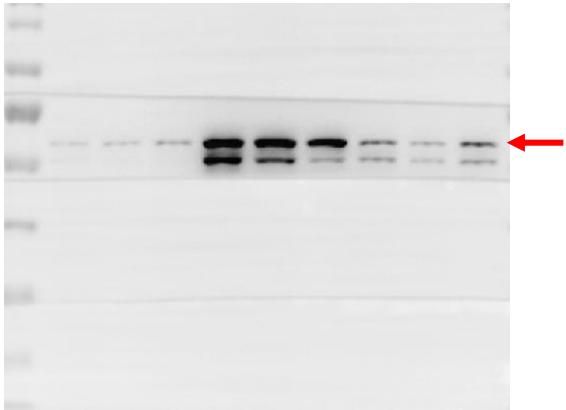

Twist (26kD)

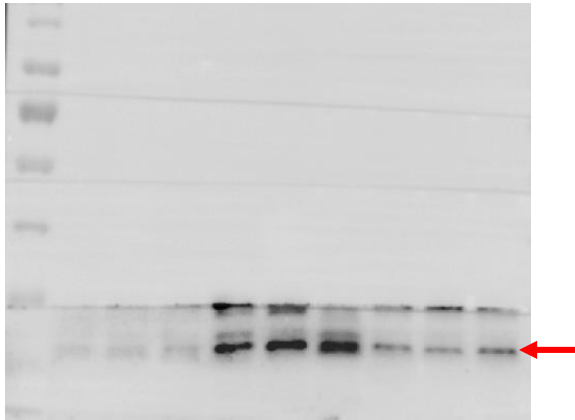

SMA (43kD)

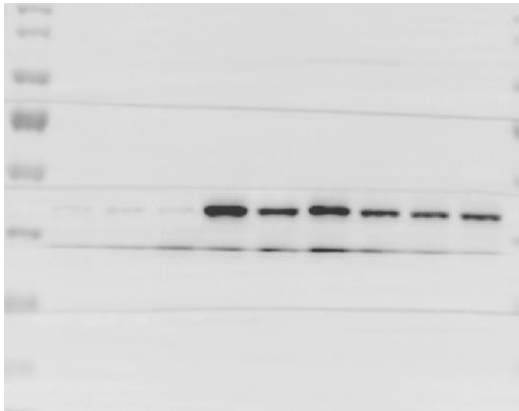

SM22 $\alpha$  (22 kDa)

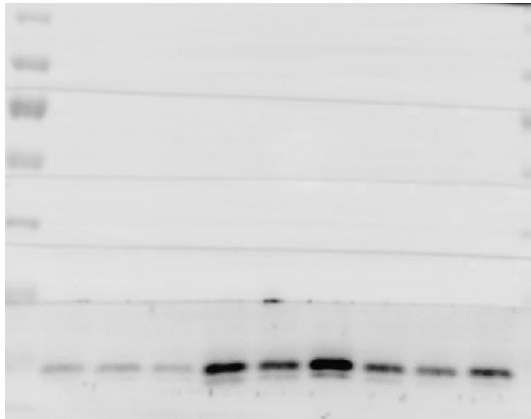

GAPDH (37 kDa)

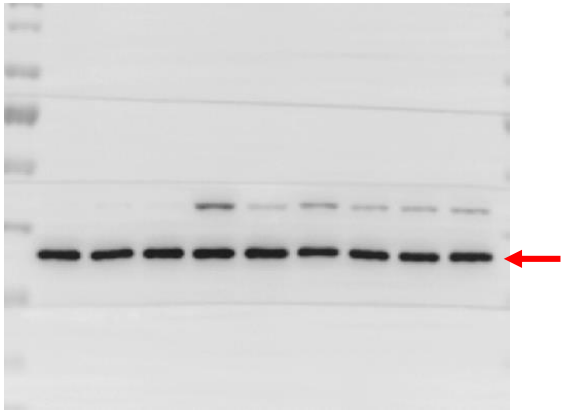

**Figure 7H.**

Snail (29 kDa)

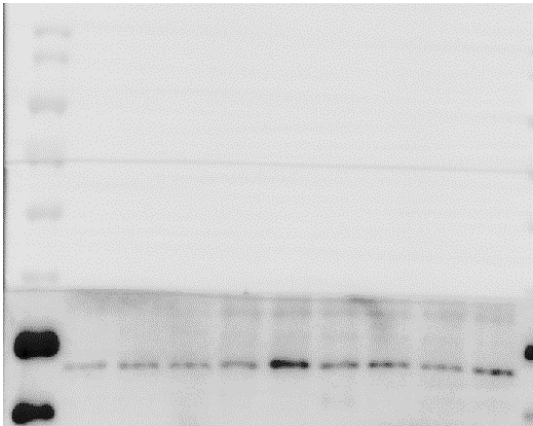

Slug (30 kDa)

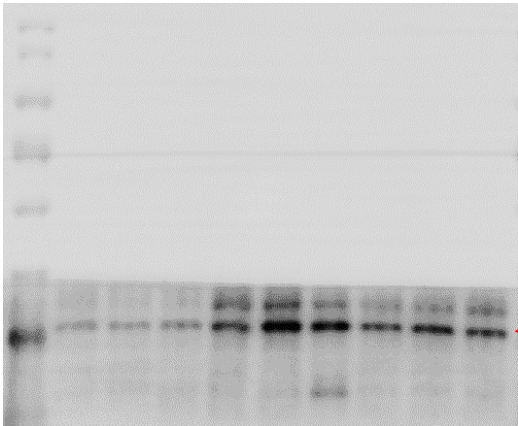

GAPDH (37 kDa)

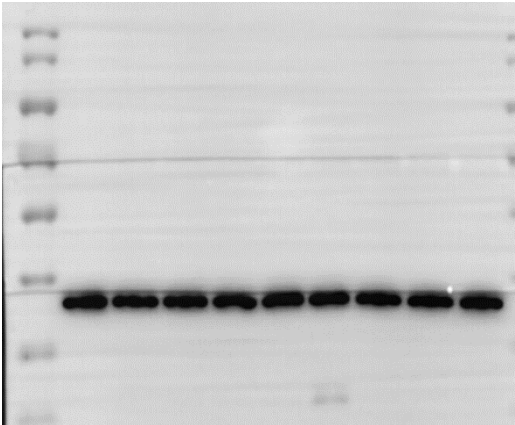

Collagen I (120 kDa)

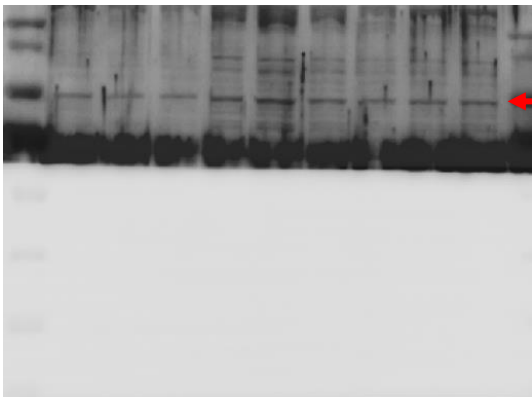

GAPDH (37 kDa)

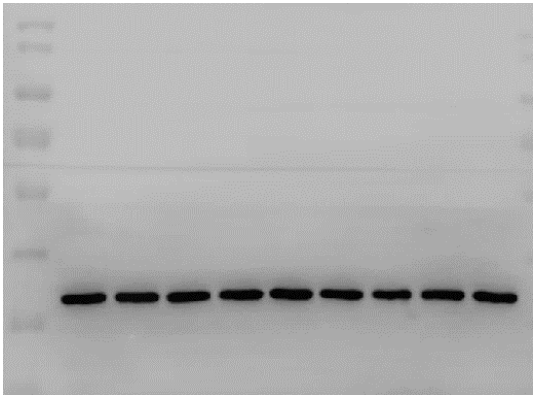

**Figure8D**

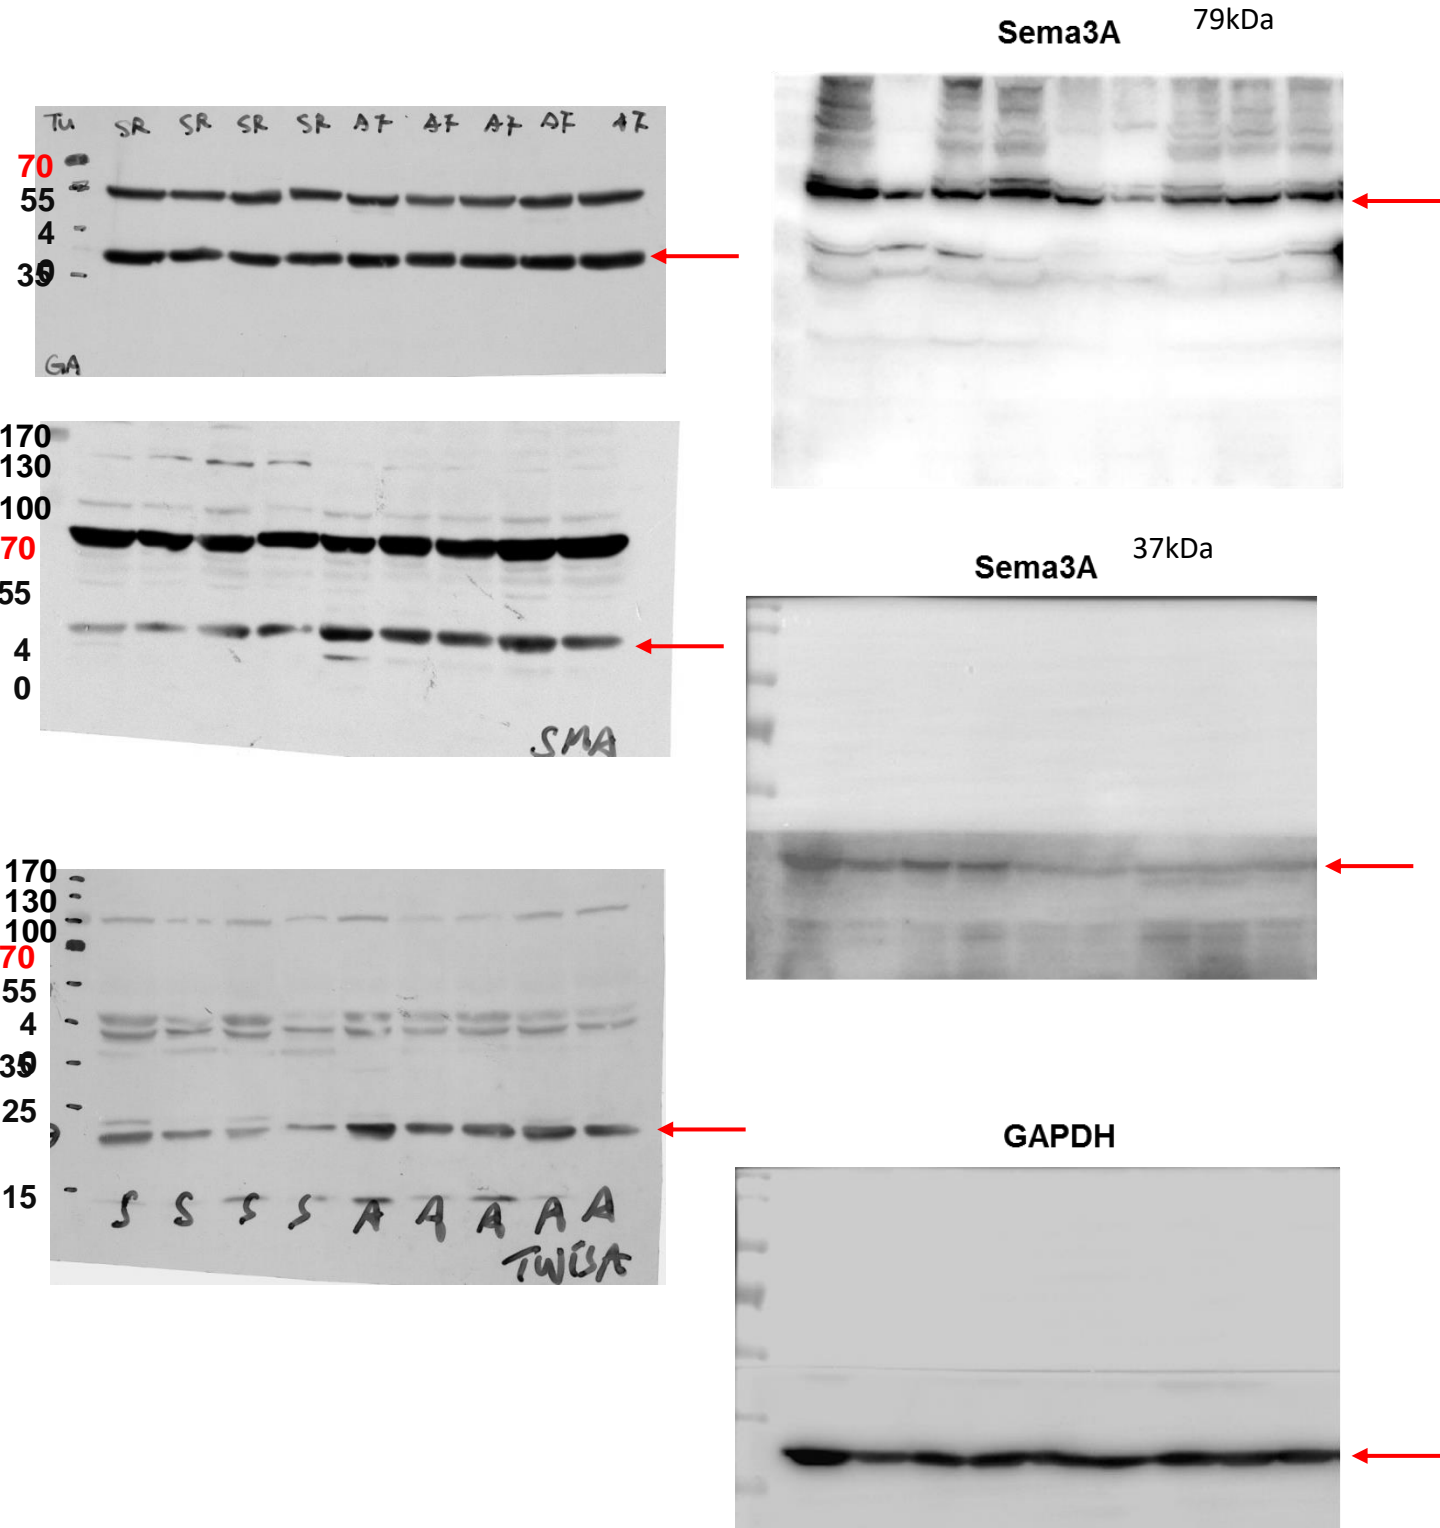

# Supplemental Figure 2C

CD31

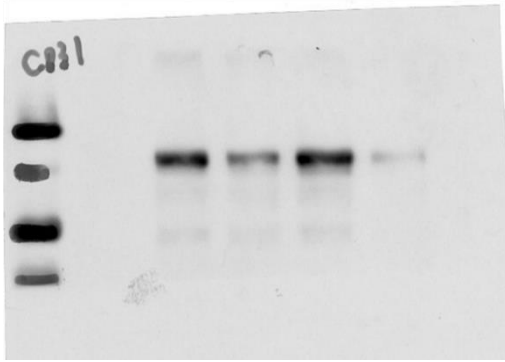

eNOS

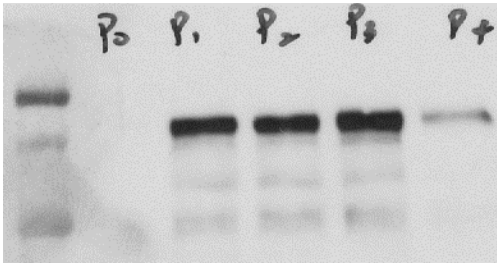

tubulin

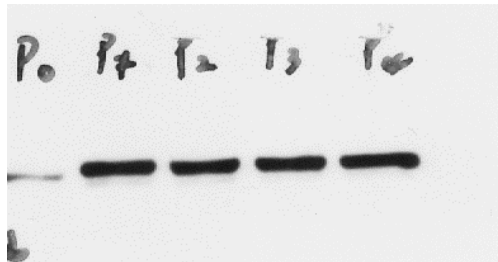

Supplement Figure 4.

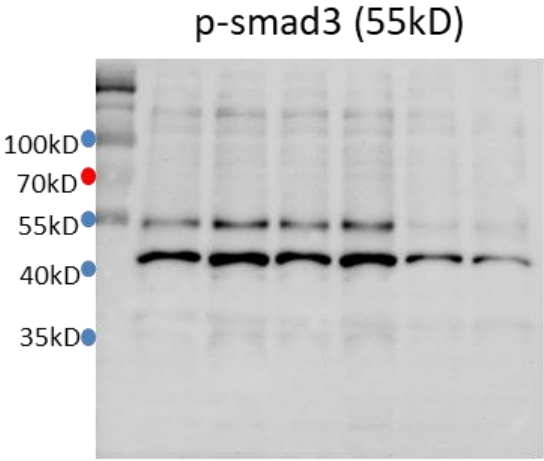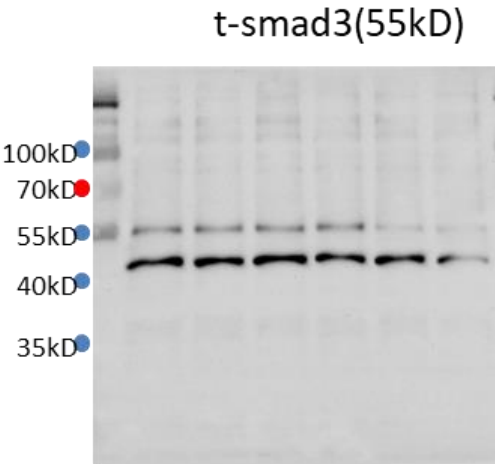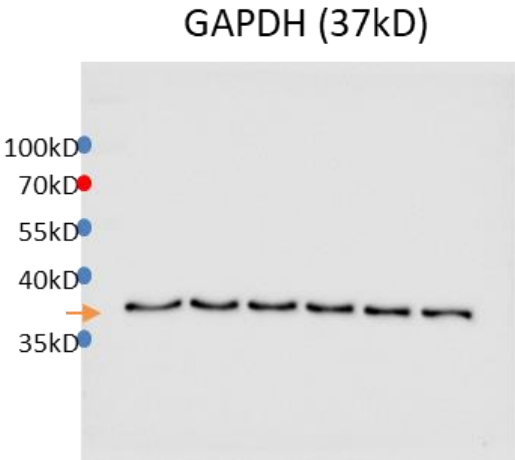

Supplement: jci-132-142548-s213.pdf [file jci-132-142548-s213.pdf]
